15 ABSTRACT

16 Human cerebral cortex can produce visuomotor responses that are modulated by contextual  
17 and task-specific constraints. However, the distributed cortical network for visuomotor  
18 transformations limits the minimal response time of that pathway. Notably, humans can  
19 generate express visuomotor responses that are inflexibly tuned to the target location and  
20 occur 80-120ms from stimulus presentation (stimulus-locked responses, SLRs). This suggests  
21 a subcortical pathway for visuomotor transformations involving the superior colliculus and its  
22 downstream reticulo-spinal projections. Here we investigated whether cognitive expectations  
23 can modulate the SLR. In one experiment, we recorded surface EMG from shoulder muscles  
24 as participants reached toward a visual target whose location was unpredictable in control  
25 conditions, and partially predictable in cue conditions by extrapolating a symbolic cue (75%  
26 validity). Valid symbolic cues led to faster and larger SLRs than control conditions; invalid  
27 symbolic cues produced slower and smaller SLRs than control conditions. This is consistent  
28 with a cortical top-down modulation of the putative subcortical SLR-network. In a second  
29 experiment, we presented high-contrast targets in isolation (control) or ~24ms after low-  
30 contrast stimuli, which could appear at the same (valid cue) or opposite (invalid cue) location  
31 as the target, and with equal probability (50% cue validity). We observed faster SLRs than  
32 control with the valid low-contrast cues, whereas the invalid cues led to the opposite results.  
33 These findings may reflect exogenous priming mechanisms of the SLR network, potentially  
34 evolving subcortically via the superior colliculus. Overall, our results support both top-down  
35 and bottom-up modulations of the putative subcortical SLR network in humans.

36

37 NEW & NOTEWORTHY

38 Express visuomotor responses in humans appear to reflect subcortical sensorimotor  
39 transformation of visual inputs, potentially conveyed via the tecto-reticulo-spinal pathway.  
40 Here we show that the express responses are influenced both by symbolic and barely  
41 detectable spatial cues about stimulus location. The symbolic cue-induced effects suggest  
42 cortical top-down modulation of the putative subcortical visuomotor network. The effects of  
43 barely detectable cues may reflect exogenous priming mechanisms of the tecto-reticulo-spinal  
44 pathway.

45

46 **Keywords:**

47 Rapid visuomotor response; low-contrast stimulus; reaching; subcortical motor control;  
48 superior colliculus

49

## 50 INTRODUCTION

51       Extraction of information about the surrounding environment is crucial to guide motor  
52 behaviour in everyday life and sport contexts, but also to react to threatening events for  
53 survival. In higher vertebrates, the availability of a cerebral cortex enables extrapolation of  
54 surrounding sensory cues and generation of expectations about probable future events. These  
55 expectations can facilitate the transformation of expected sensory information into motor  
56 responses, thus reducing the reaction time (RT; see for review Posner 2016; van Ede et al.  
57 2012).

58       Humans are capable of generating extremely rapid (*express*) responses to visual  
59 stimuli (Pruszynski et al. 2010). As opposed to the so-called volitional muscle response, the  
60 initiation time of these early EMG responses does not co-vary with the movement onset time  
61 and is consistently within 80-120ms after stimulus presentation (Pruszynski et al. 2010;  
62 Wood et al. 2015). Therefore, these express visuomotor responses have been called stimulus-  
63 locked responses (SLRs; see Contemori et al. 2020 for discussion of appropriate  
64 nomenclature). Furthermore, the SLR is always directed toward the stimulus location  
65 irrespective of whether the task requires to move toward (pro-reach) or against (anti-reach)  
66 the stimulus (Gu et al. 2016), or to withhold the movement (Atsma et al. 2018). It is worth  
67 noting that the short-latency and inflexible characteristics of SLRs are also properties of  
68 express saccades, which are generated subcortically via the superior colliculus and its  
69 downstream projections to the reticular formation (Dorris et al. 1997; Pare and Munoz 1996;  
70 Fischer and Boch 1993). Therefore, the SLR may also result from subcortical sensorimotor  
71 transformation of visual inputs through the tecto-reticulo pathway and its downstream  
72 projections to the spinal motoneurons and interneurons (see for review Corneil and Munoz  
73 2014).

74       The occurrence of express saccades increases as a function of collicular *pre-target*  
75 activity level (Dorris et al. 1997; Dorris et al. 2002), probably via a direct influence on  
76 collicular *target-related* response amplitude. For instance, cueing the target with a prior  
77 (~50ms) stimulus at the same location (i.e. valid cue) has been shown to prime the pre-target  
78 activity of superior colliculus neurons and amplify the ensuing target-related response  
79 (Fecteau et al. 2004). This facilitates both rapid initiation of saccades (Fecteau et al. 2004)  
80 and neck muscle SLRs (Corneil et al. 2008) as compared with no-cued and invalidly cued  
81 targets, a phenomenon known as *attention capture* (for review see Klein 2000; Corneil and  
82 Munoz 2014). These observations suggest that target-directed visuomotor behaviours are  
83 modulated as a function of pre-target sensory events and their influence on visuomotor  
84 networks, including the superior colliculus and its downstream reticulo-spinal circuits.

85 In the first experiment, we tested the hypothesis that pre-target signals affording  
86 cognitive expectations about the location of approaching targets can modify the SLR  
87 expression. Therefore, we employed a pre-target cue whose information depended on its  
88 perceived orientation rather than its location, thus requiring cognitive extrapolation. In the  
89 second experiment, we used a different target-cueing paradigm to study the influence of  
90 barely detectable visual events on visuomotor behaviour, and tested the hypothesis that SLRs  
91 are participant to bottom-up priming effects. The purpose of this paper was to delineate the  
92 influence of symbolic and barely detectable visual cues on express visuomotor behaviour.  
93 This would provide evidence about the influence of both top-down and bottom-up neural  
94 modulation mechanisms of the SLR and its putative underlying subcortical network,  
95 including the superior colliculus. The findings may contribute to our understanding of the  
96 neural mechanisms underlying express visuomotor behaviour in humans.

97

## 98 MATERIALS AND METHODS

### 99 **Participants**

100 Sixteen adults participated in the first experiment (14 males, 2 females; mean age: 31.6  
101 years, SD: 6.9), and twelve of them also completed the second experiment (11 males, 1  
102 female; mean age: 31.3 years, SD: 6.0). All participants were right-handed, had normal or  
103 corrected-to-normal vision, and reported no current neurological, or musculoskeletal  
104 disorders. They provided informed consent and were free to withdraw from the experiment at  
105 any time. All procedures were approved by the University of Queensland Medical Research  
106 Ethics Committee (Brisbane, Australia) and conformed to the Declaration of Helsinki.

107

### 108 **Apparatus**

109 The apparatus used for this study has been previously described by Contemori et al.  
110 (2020). Briefly, the participants performed target-directed reaching movements with their  
111 dominant hand via shoulder extension (right ward), or flexion (left ward), movements in the  
112 transverse plane. Because muscle pre-activation has proven effective to facilitate SLR  
113 expression (Gu et al. 2016; Contemori et al. 2020), a constant lateral load of ~5N was applied  
114 in the direction of transverse shoulder extension via a weight and pulley system. This  
115 increased the baseline activity of shoulder transverse flexor muscles, including the clavicular  
116 head of pectoralis major muscle.

117 All stimuli were created in Matlab using the Psychophysics toolbox (Brainard 1997;  
118 Pelli 1997), and were displayed on a LCD monitor with a 120Hz refresh rate ( $8.\overline{33}$ ms/refresh

119 cycle) positioned ~57cm in front of the participants. For the first experiment, the target was a  
120 full and filled black circle of ~2dva in diameter presented against a light grey background.  
121 This created a high target-to-background contrast (luminance: black target, ~0.3 cd/m<sup>2</sup>; grey  
122 background, ~137 cd/m<sup>2</sup>) which has been shown to enhance SLR expression (Wood et al.  
123 2015). Conversely, in the second experiment we used high-contrast (~0.3 cd/m<sup>2</sup>) and low-  
124 contrast targets, which were both full filled circles of ~2dva in diameter. For each participant,  
125 the low-contrast target luminance was customized to visual acuity (see below for details). On  
126 average, the low-contrast stimulus luminance was ~119.7cd/m<sup>2</sup>. The luminance was  
127 measured with a colorimeter (Cambridge Research System ColorCAL MKII). A photodiode  
128 was attached to the left bottom corner of the monitor to detect a secondary light that was  
129 presented coincidentally with the time of appearance of the real target. This allowed us to  
130 index the time point at which the stimulus was physically detectable, thus avoiding  
131 uncertainties in software execution and raster scanning of the monitor.

132

### 133 **Experimental design**

#### 134 *Experiment 1: symbolic cue*

135 This experiment was designed to investigate the influence of cognitive expectations on  
136 express visuomotor responses. The participants were instructed to reach as fast as possible  
137 toward a visual target that appeared as a brief flash of a complete circle, features that  
138 facilitate SLRs (Contemori et al. 2020; Kozak et al. 2019). The target location was  
139 unpredictable or partially predictable from the orientation of a symbolic arrow-shaped cue  
140 (Figure 1). The stimuli were presented via an *emerging target* paradigm (Figure 1) that has  
141 proven effective for facilitating the SLR expression in more than 80% of participants tested  
142 with surface EMG electrodes (Contemori et al. 2020), and that was motivated by preceding  
143 SLR (Kozak et al. 2020) and oculomotor studies (for review see Fiehler et al. 2019). To start  
144 the trial, the participants aligned their right hand and gaze for one second on a fixation spot  
145 (“+” sign) located in the centre of the screen and below the visual barrier (~9dva of fixation-  
146 target eccentricity). After the fixation period, the central fixation spot could remain  
147 unchanged (neutral cue, control condition) or change to an arrow pointing to the future  
148 location of the target (valid cue, 75% of cue trials) or in the wrong direction (invalid cue,  
149 25% of cue trials). Note that the physical position of the cue was irrelevant with respect to the  
150 future target locations. At ~700ms after the cue presentation, the target dropped at constant  
151 velocity (~35dva/s) toward the visual barrier for ~160ms, and always re-emerged (‘go’  
152 signal) below it after ~640ms from the onset of its movement (i.e. predictably timed  
153 stimulus). Therefore, the target was occluded by the barrier for ~480ms and re-emerged after

154 ~1.34s from the cue presentation (Figure 1). We decided to use a cue-target onset asynchrony  
155 (CTOA) of more than 1 second in order to ensure unambiguous cognitive extrapolation of the  
156 arrow orientation. Note that the temporal events timings have been adjusted by rounding the  
157 values to the nearest ten milliseconds (full monitor scanning occurred every 100 ms, see  
158 previous section).

159 On each trial, gaze-on-fixation was checked on-line with an EyeLink 1000 plus tower-  
160 mounted eye tracker device (SR Research Ltd., Ontario, Canada), at a sampling rate of 1000  
161 Hz. If the fixation requirement was not met, participants received an error message and the  
162 trial was repeated. Each participant completed 10 blocks of 72 reaches/block (36 for each  
163 direction), with each block consisting of 46 valid, 16 invalid and 10 neutral cues, randomly  
164 intermingled.

165

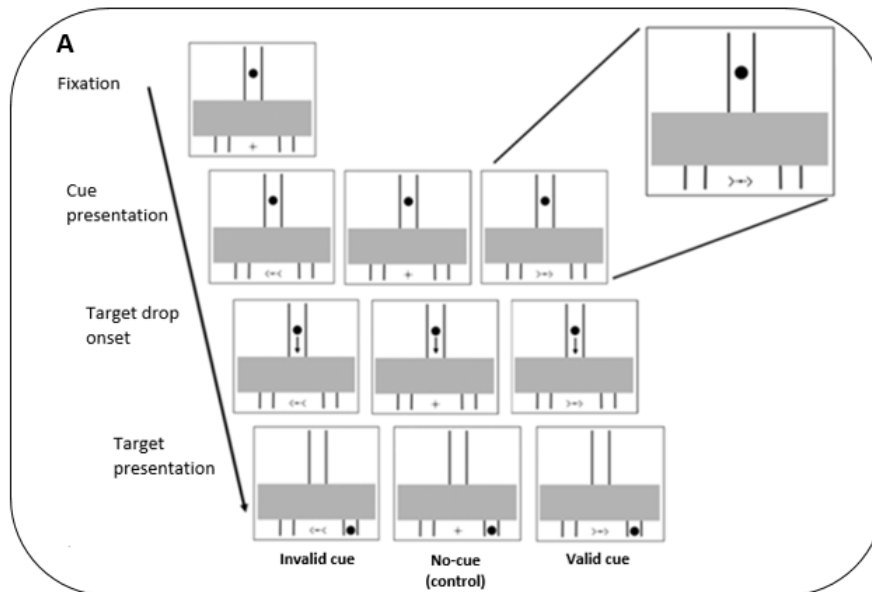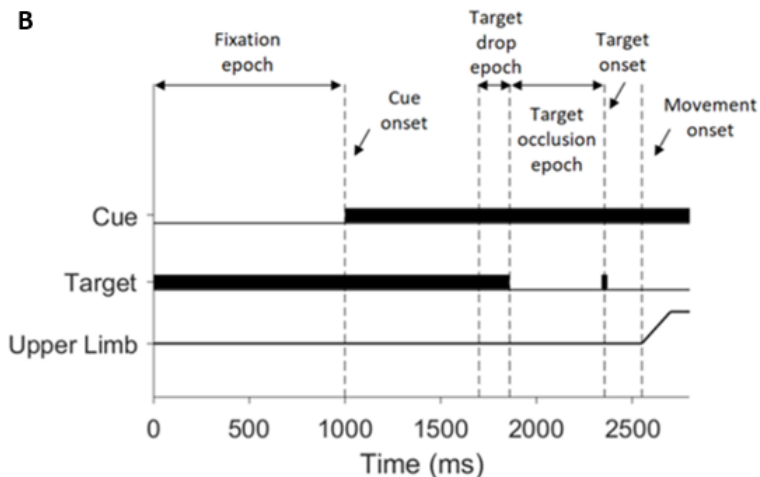

166

167 **Figure 1:** (A) Timeline of no-cue (control), valid and invalid cue conditions of the first experiment. A zoomed  
168 view of the symbolic arrow-shaped cue is shown in the top right corner. In these examples, the target appears to  
169 be on the right so the right inset panels show a valid cue trial, whereas the left inset panels show an invalid cue trial.  
170 (B) Schematic diagram of temporal events in the cue conditions. After one second of fixation, the central cross  
171 bar for fixation remained unchanged in the control condition whereas it was substituted by an arrow cue  
172 pointing toward the exact future location of the target (valid cue, 75% of cue trials) or in the wrong direction  
173 (invalid cue, 25% of cue trials). After ~700ms from cue presentation, the target started dropping from the stem  
174 of the track at constant velocity of ~35dva/s until it passed behind the barrier (occlusion epoch) for ~480ms, and  
175 re-appeared underneath it at ~640ms from the onset of its movement. The target appeared transiently by making  
176 one single flash of ~8ms of duration.  
177

## 178 *Experiment 2: low-contrast cue*

179 In this experiment, we aimed to investigate whether the SLR is modified by spatially  
180 cueing the target location with barely detectable cues. For each participant, we initially set the  
181 target-luminance threshold for stimulus detection as a function of visual acuity via an  
182 adaptive (staircase) procedure (Kindom and Prins 2016). The task was the same as the control  
183 conditions in the first experiment, but the circle started dropping immediately after 1 second  
184 of fixation (Figure 2) and the luminance of the target flashing underneath the barrier was  
185 changed trial-by-trial depending on preceding response. Specifically, we generated an array  
186 of twenty-two logarithmic scaled steps of luminance ranging from high-contrast target  
187 luminance (~0.3 cd/m<sup>2</sup>) to background luminance (~137 cd/m<sup>2</sup>). The participants were  
188 required to reach toward the first target flash they perceived below the barrier as soon as  
189 possible, and to guess the target location by moving arbitrarily right or left if nothing was  
190 perceived. If the movement direction was correct (see below), then the target luminance was  
191 made dimmer (i.e. closer to background colour) by selecting the next luminance level in the  
192 array (i.e. one step up). By contrast, if the movement was incorrect the target luminance was  
193 made four times darker than the last flashed target (i.e. four steps down in the array - this only  
194 happened when the target was at least five steps dimmer than the high-contrast target). No-  
195 movement trials were also classified as incorrect movements. Further, random jumps of target  
196 luminance were used in order to avoid trial-by-trial dependencies (Kindom and Prins 2016).  
197 The staircase procedure was terminated after ten reversals (i.e. wrong reach made after a  
198 correct response) of the target luminance, which occurred on average after ~65 trials. The  
199 final low-contrast stimulus used in the second experiment (Figure 2) had the average  
200 luminance used in the 10 trials before the last reversal, corresponding to correct stimulus  
201 detectability on ~80% of presentation as per the “1up/4down” staircase approach (Kindom  
202 and Prins 2016).

203

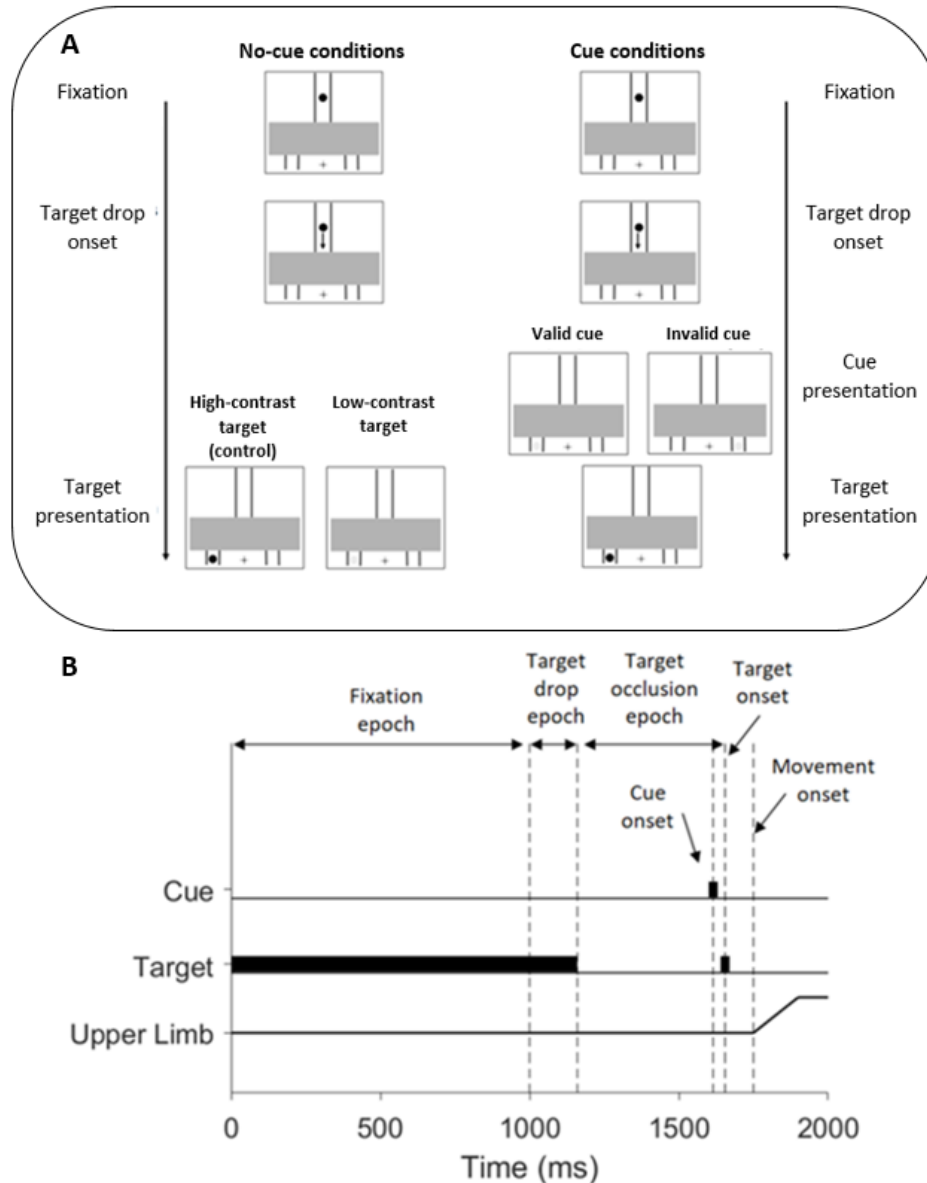

204

205 **Figure 2:** (A) Timeline of high-contrast (control condition) target, low-contrast (dim grey dot) target, valid, and  
 206 invalid cue conditions of the second experiment. In these examples, the high-contrast target appears to the left,  
 207 so the valid cue condition is satisfied when the low-contrast stimulus (dim grey dot) appears to the left, whereas  
 208 it appears to the right in the invalid cue condition. The low-contrast cue appeared with equal probability at the  
 209 same (valid cue) or opposite (invalid cue) location of the ensuing high-contrast target (i.e. 50% cue validity). (B)  
 210 Schematic diagram of temporal events in the cue conditions. After one second of fixation at the central cross  
 211 bar, the target started dropping from the stem of the track at constant velocity of ~35dva/s until it passed behind  
 212 the barrier (occlusion epoch) for ~480ms. The low-contrast cue appeared after ~616ms from the trial start and  
 213 stayed on for ~8ms. The high-contrast target re-emerged transiently (one single flash of ~8ms of duration)  
 214 underneath the barrier after ~640ms from the trial start. Therefore, the temporal gap between the low-contrast  
 215 cue and the high-contrast target was ~24ms.

216

217 For the main experiment, we used four unique target conditions: (I) high-contrast  
 218 (control) target appearing alone underneath the barrier; (II) low-contrast targets appearing  
 219 alone underneath the barrier; (III) low-contrast cue appearing at the same location of the  
 220 high-contrast target (valid cue); (IV) low-contrast cue appearing at the opposite location of



221 the high-contrast target (invalid cue). In the cue conditions, the high-contrast target was  
222 validly or invalidly cued with equal probability (i.e. 50% cue validity). The low-contrast cue  
223 appeared three frames (~24ms) before the high-contrast target, by making a single flash of  
224 ~8ms of duration (Figure 2). Importantly, the dim luminance, short CTOA and irrelevant  
225 validity (50%) of the low-contrast cues were designed to minimize the involvement of  
226 cortical networks in cue processing. Moreover, the brief ~24ms CTOA was chosen in order to  
227 avoid *inhibition of return*, a phenomenon known to reverse the advantaging and  
228 disadvantaging effects that are otherwise induced by validly and invalidly cueing a target,  
229 respectively (for review see Klein 2000). On each trial, the target that dropped toward the  
230 barrier was always a full and filled black circle, thus making impossible for the participants to  
231 predict the target condition from trial context. The participants were instructed to reach as  
232 fast as possible toward the first perceived target flash underneath the barrier, and to guess the  
233 target location by reaching arbitrarily right or left if no stimulus was detected. They  
234 completed 10 blocks of 64 reaches/block, with each block consisting of 16 trials of each of  
235 the 4 different target conditions, randomly intermingled.

236

### 237 **Data recording**

238 Surface EMG (sEMG) activity was recorded from the clavicular head of the right  
239 pectoralis muscle (PMch) and the posterior head of the right deltoid muscle (PD), with  
240 double-differential surface electrodes (Delsys Inc. Bagnoli-8 system, Boston, MA, USA).  
241 The quality of the signal was checked with an oscilloscope before the start of recording. The  
242 sEMG signals were amplified by 1000, filtered with a 20-450Hz bandwidth filter by the  
243 native ‘Delsys Bagnoli-8 Main Amplifier Unit’, and full-wave rectified after digitization  
244 without further filtering. Arm motion was monitored by a three-axis accelerometer (Dytran  
245 Instruments, Chatsworth, CA; Contemori et al., 2020). The sEMG and kinematic data were  
246 sampled at 2 kHz with a 16-bit analog-digital converter (USB-6343-BNC DAQ device,  
247 National Instruments, Austin, TX, USA). Data synchronization was guaranteed by starting  
248 the recording of the entire data-set at the frame at which the target started moving toward the  
249 barrier.

250 Reaction time (RT) was monitored by running a cumulative sum analysis (Basseville  
251 and Nikiforov 1993) on the acceleration signal, as described in Contemori et al., 2020. In  
252 order to minimize the occurrence of anticipatory responses, we monitored the RT online and  
253 sent an error message if the participants moved before the target onset time or responded in  
254 less than 130ms from target presentation (~3 trials/block). This RT cut-off was adopted  
255 because 130ms has been recently shown to be the critical time to prepare a target-directed

256 response (Haith et al. 2016). Furthermore, the initiation of a movement requires agonist  
257 muscles activation and antagonist muscles inhibition in order to generate enough net joint  
258 torque to overcome limb inertia and produce angular acceleration at the joint. If a target-  
259 directed movement occurs faster than 130ms, the potential short-latency sEMG response  
260 occurring in the SLR epoch (i.e. 80-120ms from target onset) could be contaminated by an  
261 anticipatory voluntary response. This would make impossible to distinguish the SLR from the  
262 muscle activity that is time-locked with the voluntary movement initiation. To further reduce  
263 this risk, we adopted a more conservative RT cut-off for offline data analysis, by excluding  
264 trials with  $RT < 140\text{ms}$  (~7% of the trials).

265 The accelerometer signal also allowed us to identify correct and wrong responses.  
266 Specifically, we searched for the first peak/valley of acceleration subsequent to the RT index  
267 in order to define the initial movement direction. We then compared the movement direction  
268 with the target location. If the target location did not correspond with the movement  
269 direction, the trial was classified as incorrect and discarded (see results). This analysis was  
270 run online for the staircase procedure adopted in the second experiment to customize the low-  
271 contrast target luminance on each participant visual acuity (see above).

272

## 273 **Data analysis**

### 274 *Indexing the presence, timing and magnitude of SLRs*

275 The presence of a candidate SLR was identified with a time-series receiver operator  
276 characteristic (ROC) analysis. This analysis allowed us to index the point in time at which the  
277 location of the target could be discriminated (discrimination time, DT) from the sEMG trace  
278 (Pruszynski et al. 2010). For every muscle sample and tested condition not showing  
279 anticipatory activity (for details see Contemori et al. 2020), we sorted the correct trials  
280 according to RT and subdivided the sEMG trials into two equally-sized trial sets by doing a  
281 median split on the RT data (Figure 3A and D). We then ran separate ROC analyses on the  
282 fastest 50% (*fast* trial set) and the slowest 50% (*slow* trial set) of the trials to extrapolate the  
283 area under the ROC curve (AUC). The AUC values range from 0 to 1, where a value of 0.5  
284 indicates chance discrimination, whereas a value of 1 or 0 indicates perfectly correct or  
285 incorrect discrimination, respectively. We set the thresholds for discrimination at 0.65 (Figure  
286 3B and E); this criterion exceeds the 95% confidence intervals of data randomly shuffled with  
287 a bootstrap procedure. The time of earliest discrimination was defined as the time after  
288 stimulus onset at which the AUC overcame the defined threshold, and remained above that  
289 threshold level for at least 15ms. The candidate SLR was considered only if both fast and

290 slow trial discrimination times were within 80-120ms after target presentation (Gu et al.  
291 2016; Contemori et al. 2020). Further, we associated the fast and slow DTs with the average  
292 RT of fast and slow data sets (Wood et al. 2015), and we fitted a line to the data to test if the  
293 DT did not co-vary with the RT (i.e. line slope  $>67.5^\circ$ , Figure 3C; for further details see  
294 Contemori et al., 2020). In this case, we ran the ROC analysis on all trials to extrapolate the  
295 *all-trials* set DT (Figure 3E). Finally, we defined the SLR initiation time by running a two-  
296 pieces “DogLeg” linear regression analysis (Carroll et al. 2019; Pruszynski et al. 2008)  
297 recently adopted by Contemori et al. (2020) to index the point in time at which the time-  
298 series ROC curve begins to deviate positively toward the 0.65 discrimination threshold  
299 (Figure 3E). Importantly, this analysis allowed us to extrapolate the EMG response initiation  
300 time regardless of the slope of the ROC curve as it deviated toward the discrimination  
301 threshold (Contemori et al. 2020).

302 To quantify the SLR amplitude, on each trial we measured the mean sEMG activity  
303 recorded in the 10ms subsequent to the DT of the slow trial sets (Contemori et al. 2020). This  
304 method allowed us to quantify the muscle activity enclosed in a short time window in which  
305 the earliest target-related EMG response had been identified (i.e. DT within 80-120ms from  
306 target onset time) for both the fast and slow trial sets.  
307

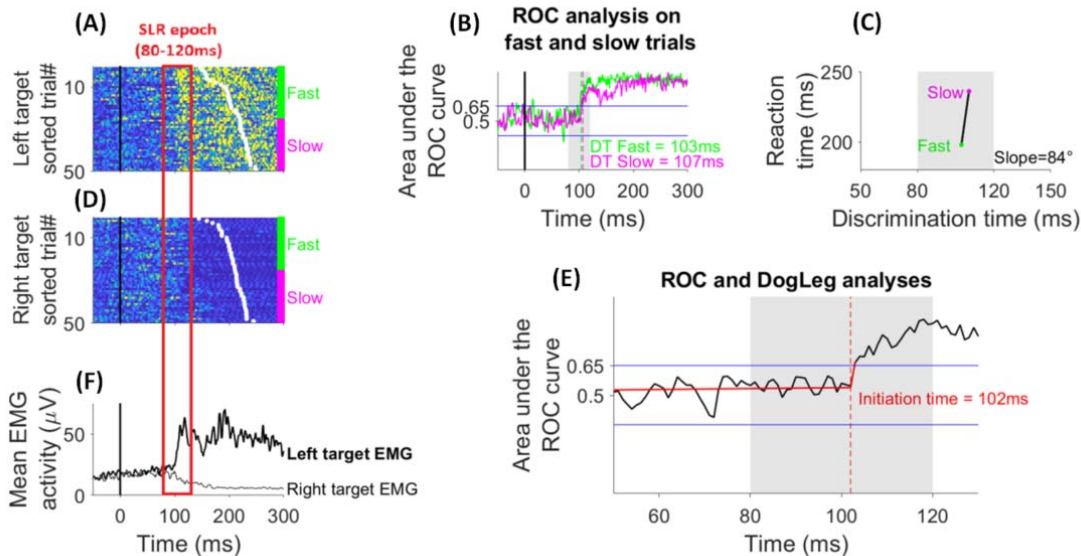

308 **Figure 3:** Exemplar sEMG activity from the clavicular head of pectoralis major of a participant who exhibited  
309 an SLR in the control condition of the first experiment (participant 8, table 1). The muscle acts as agonist and  
310 antagonist for (A) left and (D) right targets, respectively. Rasters of rectified surface sEMG activity from  
311 individual trials are shown (darker yellow colours indicate greater sEMG activity; panel A and D) as are the  
312 traces of the (F) mean sEMG activity (thick line = left target EMG; thin line = right target EMG). Data are  
313 aligned on visual target presentation (solid black vertical line at time 0) and sorted according to reaction time  
314 (white dots within the rasters). The unfilled red rectangle indicates the time window in which an SLR is expected  
315 (80-120ms from target onset). The SLR appears as a column of either rapid muscle activation (A) or inhibition  
316

317 (D) time-locked to the stimulus onset in both the fastest 50% (green bar) and the slowest 50% (magenta bar) of  
318 the trials. (B) ROC analysis panel showing the point in time at which the target location can be discriminated  
319 (discrimination time - DT) from muscle activity for the fast (green line) and slow (magenta line) sets of trials.  
320 The DT is identified by the first time frame at which the area under the ROC curve surpasses the value of 0.65  
321 (upper blue line in panel B), and remains over this threshold for 15ms (vertical dashed lines in panel B; see  
322 materials and methods). The candidate SLR was identified if the target location was discriminated by the sEMG  
323 trace within the SLR epoch (grey patch) for both of the fast and slow trial sets. (C) Panel shows a line  
324 connecting the fast and slow DTs that are plotted for the slowest and fastest half of voluntary reaction times, and  
325 the line slope is showed. For this participant, both the early and late DTs are inside the SLR epoch (grey patch)  
326 and the line slope exceeds  $67.5^\circ$ , thus indicating the presence of a visuomotor response that is more time-locked  
327 to the stimulus onset than to the reaction time. (E) Panel shows the initiation time (dashed red line) obtained by  
328 running the ROC analysis on the full set of trials, and fitting a two-pieces “DogLeg” linear regression on the  
329 ROC curve to determine the point in time at which the ROC curve started to deviate positively toward the  
330 discrimination threshold (intersection point between the red lines; see materials and methods).

331

### 332 *Cue-induced effect dimension*

333 In this study, we expected to observe cue-induced modifications of the volitional and  
334 express visuomotor responses relative to control conditions. This would indicate that cue  
335 information was encoded by some neural circuit to bias the ensuing target-related response.  
336 We quantified the RT and SLR (initiation time and magnitude) differences between control  
337 and cue conditions both as absolute and percentage changes from control conditions and  
338 (termed as *cue-induced gain*: equation 1):

$$\text{Cueinduced gain (\%)} = \left[ \frac{(Cv - CCv)}{Cv} \right] * 100 \quad (1)$$

339 Where Cv represents the control value and CCv the cue condition value.

340 For the RT and SLR initiation time, we concluded that the cue exerted an advantaging  
341 effect if it led to shorter latencies than control (i.e. positive cue-induced gains). By contrast,  
342 we concluded that the cue exerted a disadvantaging effect if it led to longer latencies than  
343 control conditions (i.e. negative cue-induced gains). For the SLR magnitude, we inverted the  
344 order of members of the subtraction in equation 1:  $(Cv - CCv) \rightarrow (CCv - Cv)$ . This  
345 allowed us to index the cue-induced gain as positive (i.e. cue advantage effect) if the SLR  
346 size was larger in cue than control conditions, and negative (i.e. cue disadvantage effect) if  
347 the SLR had a larger magnitude in control than cue conditions.

348

### 349 *Correlation of SLR magnitude with reaction time*

350 One of the most intriguing questions about the putatively subcortical SLRs is whether  
351 or not they can contribute to volitional visuomotor behaviour. To disentangle the functional  
352 contribution of SLRs to voluntary movement initiation, we ran a correlation analysis between  
353 the SLR size and the corresponding RT on a trial-by-trial basis (Pruszynski et al. 2010; Gu et  
354 al. 2016; Contemori et al. 2020). The identification of a negative correlation between the SLR  
355 magnitude and RT across the different target conditions would indicate that the SLR size may

356 influence the movement initiation, regardless of the type of stimulus (symbolic or low-  
357 contrast) cueing the target location.

358

### 359 *Statistical analysis*

360 Statistical analyses were performed in SPSS (IBMSPSS Statistics for Windows, version  
361 25, SPSS Inc., Chicago, Ill., USA) and Matlab (version R2018b, TheMathWorks, Inc., 318  
362 Natick, Massachusetts, United States). Results were analysed with t-test and repeated  
363 measure ANOVA models as the normality of the distributions was verified by the Shapiro-  
364 Wilk test. When ANOVA revealed a significant main effect or interaction, paired sample t-  
365 test were used for post-hoc comparisons. The chi-squared test was used to analyse changes in  
366 SLR prevalence between predictable and unpredictable conditions. For correlation analyses,  
367 the Pearson coefficient ( $r$ ) was computed to index the strength of association between  
368 variables. For all tests, the statistical significance was designated at  $p < 0.05$ .

369 Formal within-participant statistical comparisons could not be conducted if SLRs  
370 occurred infrequently across the different target conditions. In this circumstance, we used a  
371 single-subject statistical analysis that aimed to test the reliability of the time-series ROC  
372 analysis to compare different stimulus conditions at the single-subject level (Contemori et al.  
373 2020). Briefly, for each target condition we generated one thousand bootstrapped data sets  
374 from the original set of trials. We then ran the ROC and DogLeg analyses on each  
375 bootstrapped data set to extrapolate the distribution of SLR initiation time and magnitude. To  
376 test the statistical significance of the contrasts between the different target conditions, we  
377 compared one randomly re-sampled set of values from one target condition distribution with  
378 one randomly re-sampled set of values from the other target condition distribution (i.e. one  
379 thousand unique data comparisons for each of the three dependent variables). If the values for  
380 one target condition were larger or smaller than for the other target condition in more than  
381 95% (i.e.  $>950$ ) of cases, we concluded that the difference between the two target conditions  
382 was significant (for further details see supplementary materials in Contemori et al. 2020).

383

## 384 RESULTS

### 385 **Experiment 1: symbolic cue**

#### 386 *Task performance*

387 A significant main effect of cue-condition on task correctness ( $F_{2,15}=20.3$ ,  $p < 0.001$ )  
388 was obtained by running a one-way repeated measures ANOVA analysis. The post-hoc  
389 analysis (paired t-test) revealed that the prevalence of correct reaches was significantly lower  
390 in the invalid cue condition ( $78.3 \pm 16.1\%$ ) than the control ( $94.9 \pm 4.5\%$ ;  $t=4.6$ ,  $p < 0.001$ ) and

391 valid cue conditions ( $96.4 \pm 2.8\%$ ;  $t=4.5$ ,  $p<0.001$ ), whereas no significant difference was  
392 observed between the neutral and valid cue conditions. The fact that the highest error rate was  
393 observed with invalid cues suggests that the participants were biased to move toward the cued  
394 location. However, in the majority of invalid cue trials they correctly used the target spatial  
395 information to orient the final visuomotor response.

396 For the RT, we observed a significant main effect of cue-condition (one-way ANOVA:  
397  $F_{2,15}=27.6$ ,  $p<0.001$ ). The post-hoc analysis showed significantly shorter RTs for valid than  
398 control cue conditions (paired t-test:  $t=6.2$ ,  $p<0.001$ ; Figure 4A). By contrast, the RT was  
399 significantly longer with invalid than other cue conditions (paired t-test: control-invalid,  
400  $t=3.3$ ,  $p=0.003$ ; valid-invalid,  $t=5.9$ ,  $p<0.001$ ; Figure 4A). Furthermore, validly cueing the  
401 target led to significantly positive percentage differences relative to control conditions (one  
402 sample t-test:  $t=6.4$ ,  $p<0.001$ ; Figure 4B), whereas significantly negative cue-induced  
403 percentage gains resulted from invalidly cueing the target (one sample t-test:  $t=3.1$ ,  $p=0.004$ ;  
404 Figure 4B). These findings indicate that the participants used the information extrapolated  
405 from the symbolic cue to improve their task performance.

406

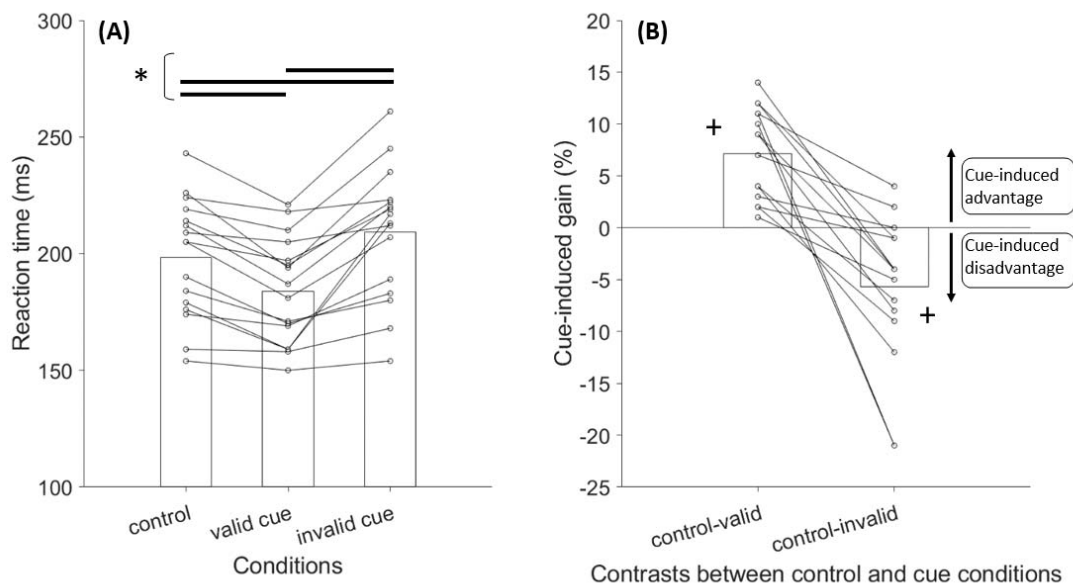

407

408 **Figure 4:** (A) Panel shows the latency of correct reaches in the control, valid and invalid cue conditions of the  
409 first experiment (see materials and methods). (B) Panel shows the percentage gains relative to control conditions  
410 induced by validly or invalidly cueing the target location with the arrow-shaped symbolic cues (see materials  
411 and methods). Positive cue-induced gains mean that cueing the target location advantaged the volitional  
412 movement initiation, whereas negative gains indicate disadvantaging cue-induced effects on reaction time. Each  
413 black line represents one participant, and the bars represent the mean values. Significant differences between  
414 task conditions: \*  $p < 0.01$ . Significant difference from 0%: + $p < 0.01$ .  
415

416 *Identified SLRs*

417 To be classified as an SLR, the target location had to be discriminated from the sEMG  
 418 signal within 80-120ms after the stimulus presentation in both fast and slow trial sets without,  
 419 or with minimal, co-variation with the volitional RT (see materials and methods). For the  
 420 PMch, the conditions for positive SLR detection were satisfied in both control and valid cue  
 421 conditions in twelve out of sixteen participants, but only 6 of them also expressed an SLR in  
 422 the invalid cue condition, and two participants did not express any SLR (Table 1). Notably,  
 423 the valid cue condition promoted SLR generation among two participants who were  
 424 otherwise negative SLR producers in the other task conditions (i.e. participants 3 and 13,  
 425 Table 1). These observations resulted in significantly ( $p < 0.05$ ) lower SLR-prevalence for  
 426 invalid cues than for control (chi-squared test;  $p = 0.033$ , chi-squared = 4.6, df = 1) and valid cue  
 427 conditions (chi-squared test;  $p = 0.003$ , chi-squared = 8.5, df = 1). Notably, the high SLR  
 428 prevalence in the control cue condition is consistent with recent studies (Kozac et al. 2020;  
 429 Contemori et al. 2020) that used similar versions of the emerging target paradigm described  
 430 here. This confirms the effectiveness of the paradigm for eliciting SLRs.

431

432 **Table 1:** Occurrences of positive SLRs (✓) in the clavicular head of the pectoralis major muscle (PMch) and the  
 433 posterior deltoid (PD) across participants in all three cue conditions tested in experiment 1.

| Cue conditions     | Control |      | Valid |       | Invalid |    |
|--------------------|---------|------|-------|-------|---------|----|
|                    | PMch    | PD   | PMch  | PD    | PMch    | PD |
| Participant        |         |      |       |       |         |    |
| 1                  | ✓       | ✓    | ✓     | ✓     | ✓       | -  |
| 2                  | ✓       | -    | ✓     | -     | ✓       | -  |
| 3                  | -       | -    | ✓     | -     | -       | -  |
| 4                  | ✓       | -    | ✓     | -     | -       | -  |
| 5                  | ✓       | -    | ✓     | ✓     | -       | -  |
| 6                  | -       | -    | -     | -     | -       | -  |
| 7                  | ✓       | -    | ✓     | -     | -       | -  |
| 8                  | ✓       | -    | ✓     | -     | ✓       | -  |
| 9                  | ✓       | -    | ✓     | -     | -       | -  |
| 10                 | ✓       | ✓    | ✓     | ✓     | ✓       | -  |
| 11                 | -       | -    | -     | -     | -       | -  |
| 12                 | ✓       | -    | ✓     | -     | ✓       | -  |
| 13                 | -       | -    | ✓     | -     | -       | -  |
| 14                 | ✓       | -    | ✓     | -     | -       | -  |
| 15                 | ✓       | -    | ✓     | -     | -       | -  |
| 16                 | ✓       | -    | ✓     | -     | ✓       | -  |
| Total SLRs (#)     | 12      | 2    | 14    | 3     | 6       | 0  |
| SLR prevalence (%) | 75      | 12.5 | 87.5  | 18.75 | 37.5    | 0  |

434

435 The fact that many fewer SLRs were observed for the PD (Table 1) is consistent with  
 436 the effects of isolated shoulder transverse extensor muscles preloading, which enhances the

437 pre-target activity of the PMch but not that of the PD (Contemori et al. 2020). Given the low  
438 occurrence of SLRs for the PD, only the PMch was considered for statistical comparisons  
439 between the different cue conditions.

440 Cueing the target location influenced the timing and amplitude of SLRs. For the  
441 exemplar participant in figure 5, the sEMG signal started to deviate from baseline 87ms after  
442 target presentation for the valid cue condition, and at 95ms for the neutral cue condition  
443 (Figure 5C). For the invalid cue condition, the muscle started to encode the target location at  
444 121ms from its presentation and, therefore, after the SLR epoch (Figure 5C). Furthermore,  
445 SLR magnitude was larger for the valid (76 $\mu$ V) than neutral (55 $\mu$ V) cue conditions. These  
446 findings resulted in positive cue-induced SLR initiation time (8.4%) and magnitude (38.2%)  
447 gains, relative to control conditions.

448

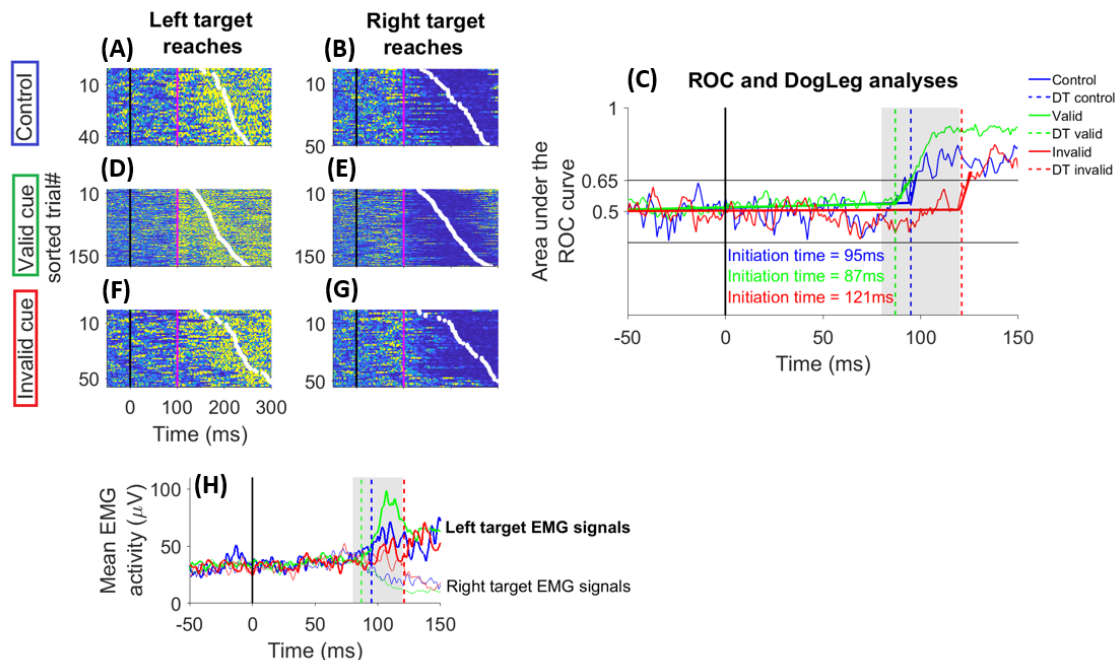

449

450 **Figure 5:** Surface EMG activity of the pectoralis major clavicular head muscle of an exemplar participant who  
451 completed the first experiment, and exhibited an SLR in control and valid cue conditions, but not in invalid cue  
452 conditions (participant 5, Table 1). For each cue condition, rasters of rectified sEMG activity from individual  
453 trials are shown (A, B, D-G; same format as figure 2). The solid magenta line indicates the expected initiation  
454 time of the SLR (~100ms from target onset). (H) Panel offers a zoomed view of the mean sEMG activity (thick  
455 lines = left target reaches; thin lines = right target reaches), and the vertical dashed lines show the initiation time  
456 of the target-related muscle response. The initiation time was indexed as the point in time at which the ROC  
457 curve started to positively diverge toward the 0.65 discrimination threshold (see materials and methods). Panel  
458 C offers a zoomed view of ROC and DogLeg analyses that were run to index the initiation time of the target-  
459 related EMG response. For this participant, the ROC curve starts to deviate earlier in valid (87ms, intersection  
460 between the straight green lines) than control (95ms, intersection between the straight blue lines) cue conditions,  
461 and after the SLR epoch in invalid cue conditions (121ms, intersection between the straight red lines).  
462



463 Similar trends were observed across the 12 participants who produced an SLR to the  
 464 control and valid cue conditions (Table 1). The initiation time was significantly shorter, and  
 465 the SLR magnitude significantly larger, in the valid (~85±8ms, ~66±32μV) than control  
 466 (~95±10ms, ~59±33μV) cue conditions (paired t-test: initiation time,  $t=4.1$ ,  $p<0.001$ ;  
 467 magnitude,  $t=1.8$ ,  $p=0.003$ ; figure 6A and C). In addition, we observed significantly positive  
 468 cue-induced percentage gains for each of the SLR parameters (one sample t-test: initiation  
 469 time,  $t=4.6$ ,  $p<0.001$ ; magnitude,  $t=2.1$ ,  $p=0.001$ ), relative to the control condition (inset plots  
 470 in figure 6A and C). These results indicate a cue-induced SLR facilitation relative to control  
 471 conditions when the target appeared at the expected location.

472

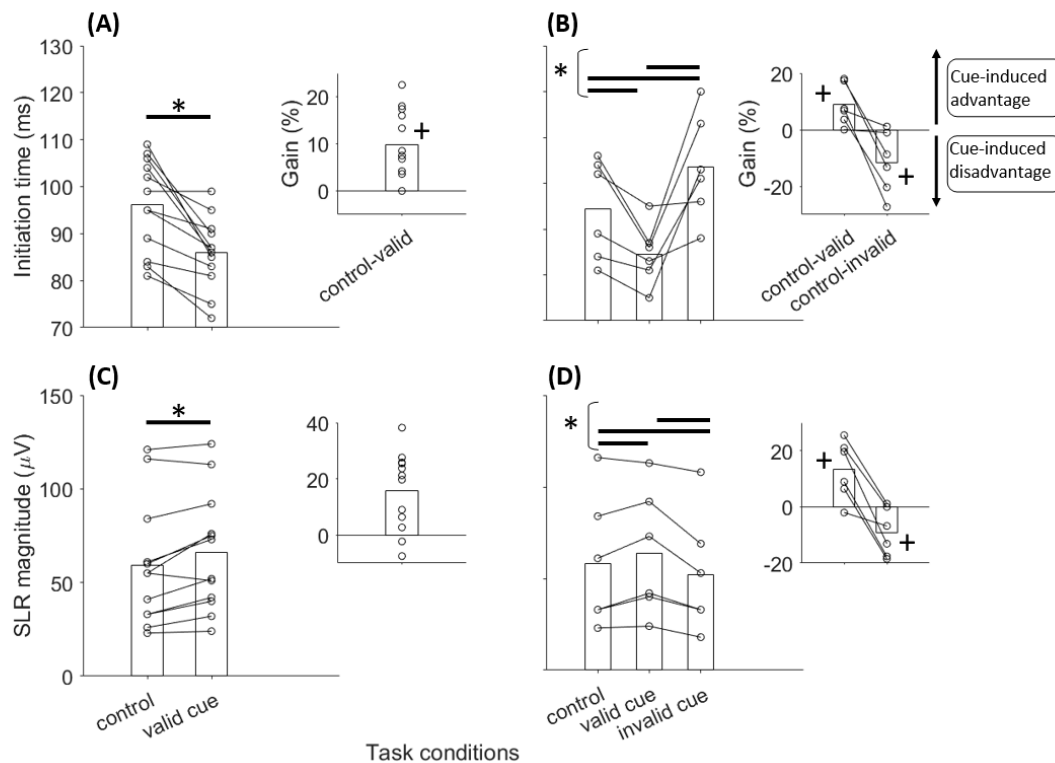

473

474 **Figure 6:** Latencies and magnitude of the express visuomotor responses in the first experiment. Panels A and C  
 475 show the results from twelve participants who exhibited an SLR in control and valid cue conditions (see Table  
 476 1), and the inset panels show the percentage gain induced by validly cueing the target location relative to control  
 477 conditions. Panels B and D show the results of six participants who exhibited an SLR in control, valid and  
 478 invalid cue conditions (see Table 1), and the inset panels show the percentage gain induced by validly and  
 479 invalidly cueing the target location relative to control conditions. Positive cue-induced gains mean that cueing  
 480 the target location advantaged the SLR expression, whereas negative gains mean disadvantaging cue-induced  
 481 effects. Each solid black line and dot represent one participant, and the bars represent the average across  
 482 participants. Validly cueing the target location with the symbolic arrow cue led to significantly (\* $p<0.01$ ) faster  
 483 (A) and larger (C) SLRs than control conditions, and to significantly positive (+ $p<0.01$ ) percentage gains  
 484 relative to control conditions (inset plots in A and C panels). The second column shows that the SLRs were  
 485 significantly (\* $p<0.05$ ) faster (B) and stronger (D) than control with valid cues, and significantly (\* $p<0.05$ )  
 486 slower (B) and smaller (D) than control with invalid cues. Moreover, validly cueing the target location led to  
 487 significantly (+ $p<0.05$ ) positive percentage gains relative to control conditions, whereas significantly (+ $p<0.05$ )

489 To complete the description of cue-induced effects on SLR expression, we ran a one-  
490 way repeated measure ANOVA analysis on the 6 participants who exhibited an SLR among  
491 all three cue conditions (Table 1). For this analysis, we defined the cue-validity (3 levels:  
492 neutral, valid, invalid) as within-participant factor. A significant cue-validity main effect was  
493 found for initiation time ( $F_{2,5}=10.3, p=0.004$ ) and SLR magnitude ( $F_{2,5}=9.87, p=0.004$ ). Post-  
494 hoc analyses showed significantly longer SLR initiation times with invalid than other cue  
495 conditions (paired t-test: control-invalid,  $t=2.8, p=0.019$ ; valid-invalid,  $t=3.5, p=0.008$ ; figure  
496 6B and D). The SLR size was significantly smaller with invalid than other cue conditions  
497 (paired t-test: control-invalid,  $t=2.4, p=0.03$ ; valid-invalid,  $t=3.6, p=0.008$ ). The results for  
498 the percentage change from control were consistent with the absolute comparisons. More  
499 precisely, we observed significantly negative cue-induced gains with the invalid relative to  
500 control cue conditions (one sample t-test: initiation time,  $t=2.6, p=0.025$ ; magnitude,  $t=2.6,$   
501  $p=0.024$ ; inset panels in figure 6B and D). These results suggest SLR inhibition effects when  
502 the expected and actual target locations were mismatched.

503

## 504 **Experiment 2: low-contrast cue**

### 505 *Task performance*

506 The occurrence of correct reaches was ~95% for control and valid low-contrast cue  
507 conditions, ~90% in the invalid low-contrast cue condition and ~85% for the single low-  
508 contrast target condition. The one-way repeated measures ANOVA analysis showed a main  
509 effect for task condition ( $F_{2,11}= 4.9, p=0.007$ ). The post-hoc analysis evidenced a  
510 significantly lower correct response rate for the low-contrast target than the control (paired t-  
511 test:  $t=4.3, p=0.001$ ) and valid cue (paired t-test:  $t=-3.7, p=0.003$ ) conditions, whereas no  
512 significant difference was observed between the invalid cue and other task conditions. These  
513 results suggest that target detection was impaired, but not fully obliterated, by the  
514 presentation of stimuli that were around the threshold for correct detection. Furthermore, the  
515 data indicate that participants moved correctly toward the high-contrast target even when it  
516 was preceded by the low-contrast cue at the opposite location.

517 A significant task-condition main effect (one-way ANOVA:  $F_{2,15}= 27.6, p<0.001$ )  
518 was found for RT. The RT was significantly longer in the low-contrast than in all of the other  
519 target conditions (paired t-test: control-low contrast,  $t=5.9, p<0.001$ ; low contrast-valid,  
520  $t=6.4, p<0.001$ ; low contrast-invalid,  $t=4.3, p<0.001$ ; Figure 7A). Further, the RT was  
521 significantly longer for the invalid cue condition than the control (paired t-test:  $t=3.1,$   
522  $p=0.005$ ) and valid cue conditions (paired t-test:  $t=4.7, p<0.001$ ). Finally, validly cueing the

523 target led to significantly faster RTs than control conditions (paired t-test:  $t=5.4$ ,  $p<0.001$ ;  
524 Figure 7A). The absolute cue-induced changes were consistent with the percentage cue-  
525 induced gains relative to control conditions. More precisely, the valid cue led to significantly  
526 positive RT gains relative to control (one sample t-test:  $t=6.2$ ,  $p<0.001$ ) conditions, whereas  
527 significantly negative RT gains were observed with invalid cues (one sample t-test:  $t=3.2$ ,  
528  $p=0.004$ ; Figure 7B). These findings indicate that the low-contrast stimulus biased the  
529 volitional reaching behaviour despite its low saliency for movement initiation, its temporal  
530 proximity (~24ms) to the high-contrast target and its lack of predictive value (50% validity)  
531 for signalling the location of the high-contrast target.  
532

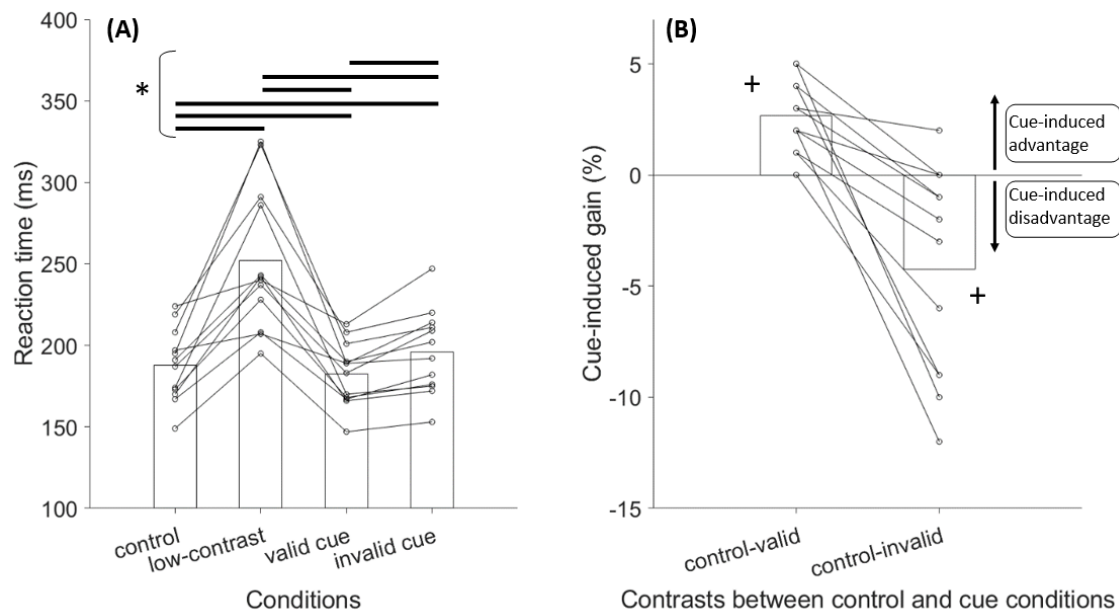

533

534 **Figure 7:** (A) Latency of correct reaches toward high-contrast targets (control condition), low-contrast targets,  
535 and high-contrast targets cued by low-contrast stimuli appearing at the same (valid cue) or opposite (invalid cue)  
536 location. (B) Panels shows the percentage gains relative to control conditions induced by validly or invalidly  
537 cueing the target location with the low-contrast cues (same format as figure 4). Significant differences between  
538 task conditions: \*  $p<0.01$ . Significant difference from 0%:  $+p<0.01$ .  
539

539

540 *SLRs*

541 The second experiment was completed by 12 participants who also participated in the  
542 first experiment. In ten of them, we detected an SLR on the PMch muscle either when the  
543 high-contrast target appeared alone (control condition) or when it was validly cued by the  
544 low-contrast stimulus, but only five of them had an SLR also for the invalid cue condition  
545 (Table 2). The presentation of the low-contrast stimulus alone elicited an SLR in only two  
546 participants, who also had an SLR in the control and valid cue conditions, but not in the  
547 invalid cue condition (see participants 1 and 3 in Table 2). Finally, two participants did not

548 exhibit any SLR (i.e. participants 4 and 8, Table 2). Akin to the first experiment, a sufficient  
 549 number of SLRs for statistical comparisons between the target conditions was obtained only  
 550 for the PMch muscle (Table 2).

551

552 **Table 2:** Occurrences of positive SLRs (✓) in the clavicular head of the pectoralis major muscle (PMch) and the  
 553 posterior deltoid (PD) across participants in all four task conditions tested in experiment 2. Participants 1-12  
 554 correspond to participant 8, 7, 1, 11, 9, 4, 10, 15, 12, 14, 5 and 13 in table 1.

| Task conditions    | Control |     | Low-contrast |    | Valid |     | Invalid |    |
|--------------------|---------|-----|--------------|----|-------|-----|---------|----|
|                    | PMch    | PD  | PMch         | PD | PMch  | PD  | PMch    | PD |
| Participant        |         |     |              |    |       |     |         |    |
| 1                  | ✓       | -   | ✓            | -  | ✓     | -   | -       | -  |
| 2                  | ✓       | -   | -            | -  | ✓     | -   | ✓       | -  |
| 3                  | ✓       | -   | ✓            | -  | ✓     | -   | -       | -  |
| 4                  | -       | -   | -            | -  | -     | -   | -       | -  |
| 5                  | ✓       | -   | -            | -  | ✓     | -   | ✓       | -  |
| 6                  | ✓       | -   | -            | -  | ✓     | -   | -       | -  |
| 7                  | ✓       | ✓   | -            | -  | ✓     | ✓   | ✓       | -  |
| 8                  | -       | -   | -            | -  | -     | -   | -       | -  |
| 9                  | ✓       | -   | -            | -  | ✓     | -   | -       | -  |
| 10                 | ✓       | -   | -            | -  | ✓     | -   | -       | -  |
| 11                 | ✓       | -   | -            | -  | ✓     | -   | ✓       | -  |
| 12                 | ✓       | -   | -            | -  | ✓     | -   | ✓       | -  |
| Total SLRs (#)     | 10      | 1   | 2            | 0  | 10    | 1   | 5       | 0  |
| SLR prevalence (%) | 83.3    | 8.3 | 16.7         | 0  | 83.3  | 8.3 | 41.7    | 0  |

555

556 Given that the same ten participants expressed an SLR to control and valid cue  
 557 conditions (i.e. participants 1-3, 5-7 and 9-12, Table 2), we only considered the control  
 558 condition to test whether the SLR prevalence was significantly different across conditions.  
 559 The Chi-squared test returned a significantly higher ( $p < 0.05$ ) SLR prevalence for control than  
 560 both low-contrast target ( $p = 0.001$ , chi-squared=10.7, df= 1) and invalid cue conditions  
 561 ( $p = 0.035$ , chi-squared=4.4, df= 1). This suggests that the low-contrast target was a less  
 562 salient stimulus for SLR generation than the high-contrast target. Further, cueing the high-  
 563 contrast target with an invalid low-contrast cue impaired, but did not completely obliterate,  
 564 the SLR expression.

565 Figure 8 shows the results of one exemplar participant who participated in the second  
 566 experiment (i.e. participant 12, Table 2). For this participant, the ROC curve started to  
 567 deviate from chance earlier for the valid (81ms; Figure 8I) and later for the invalid (110ms;  
 568 Figure 8L) cue relative to control conditions (97ms; Figure 8C). By contrast, in the low-  
 569 contrast target condition the sEMG signal started to encode the location in 130ms after the  
 570 stimulus presentation (Figure 8F), thus after the SLR epoch (i.e. 80-120ms after stimulus  
 571 onset time). The size of the SLR was similar between the high-contrast target (28 $\mu$ V) and

572 valid cue conditions (25 $\mu$ V), whereas a smaller SLR magnitude was observed for the invalid  
573 cue condition (16 $\mu$ V).

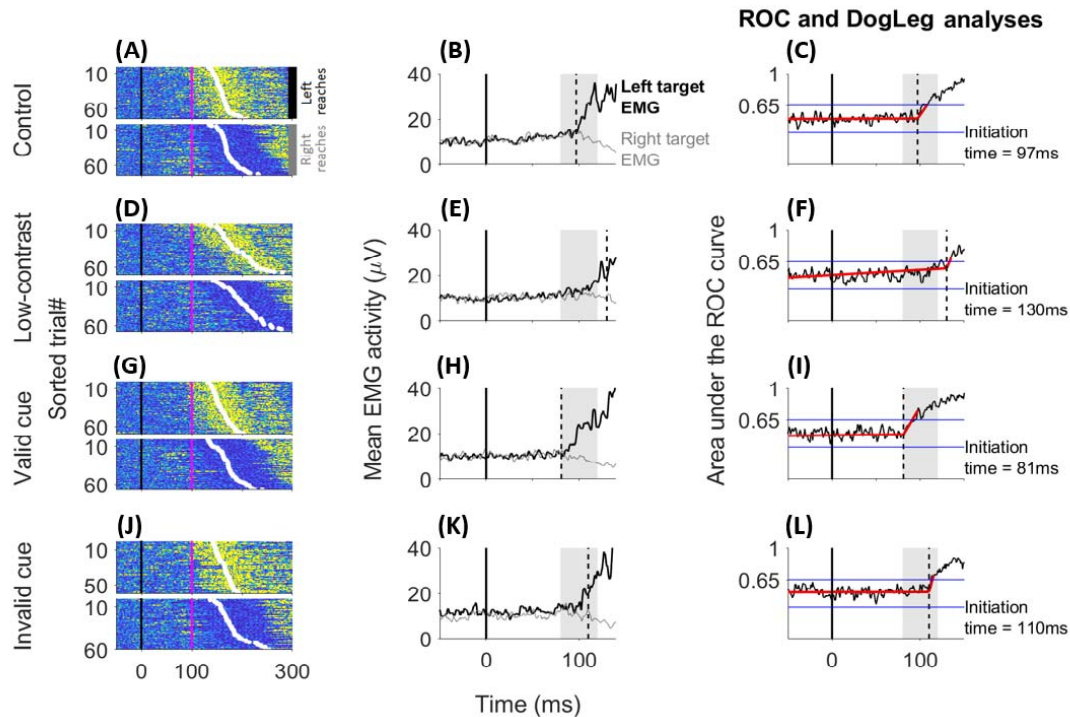

574

575 **Figure 8:** Surface EMG activity of the pectoralis major clavicular head muscle of an exemplar participant who  
576 completed the second experiment, and exhibited an SLR in (A) control, (G) valid and (J) invalid cue conditions,  
577 but not in (D) low-contrast target condition (participant 12, Table 2). For each condition, rasters of rectified  
578 sEMG activity from individual trials are shown (A, D, G, J; same format as figure 5). Panels B, E, H and K offer  
579 a zoomed view of the mean sEMG activity, and the vertical dashed lines show the initiation time of the target-  
580 related muscle response (see materials and methods; same format as figure 5). For this participant, the ROC  
581 curve starts to deviate at 97ms in (C) control, 81ms in (I) valid and 110ms in (L) invalid cue conditions, whereas  
582 the initiation time in (F) low-contrast target condition was at 130ms and, thereby after the SLR epoch (grey  
583 patch).

584

585 Similar trends were observed across the 10 participants who expressed an SLR in  
586 control and valid cue conditions (Table 2). More precisely, the SLR initiation time was  
587 significantly earlier for the valid ( $\sim 81 \pm 2$ ms) cue than control ( $\sim 90 \pm 5$ ms) conditions (paired t-  
588 test:  $t=6.1$ ,  $p<0.001$ ; Figure 9A). Furthermore, we observed a significantly positive cue-  
589 induced percentage gain of the initiation time relative to the control condition (one sample t-  
590 test:  $t=6.7$ ,  $p<0.001$ ; inset plot in Figure 9A). By contrast, no significant difference was found  
591 between the valid cue and control conditions for the SLR magnitude (Figure 9C). These  
592 results suggest that the SLR latency can be shortened by the presentation of a low-contrast  
593 stimulus appearing shortly in advance of, and at the same location, as a high-contrast target.

594

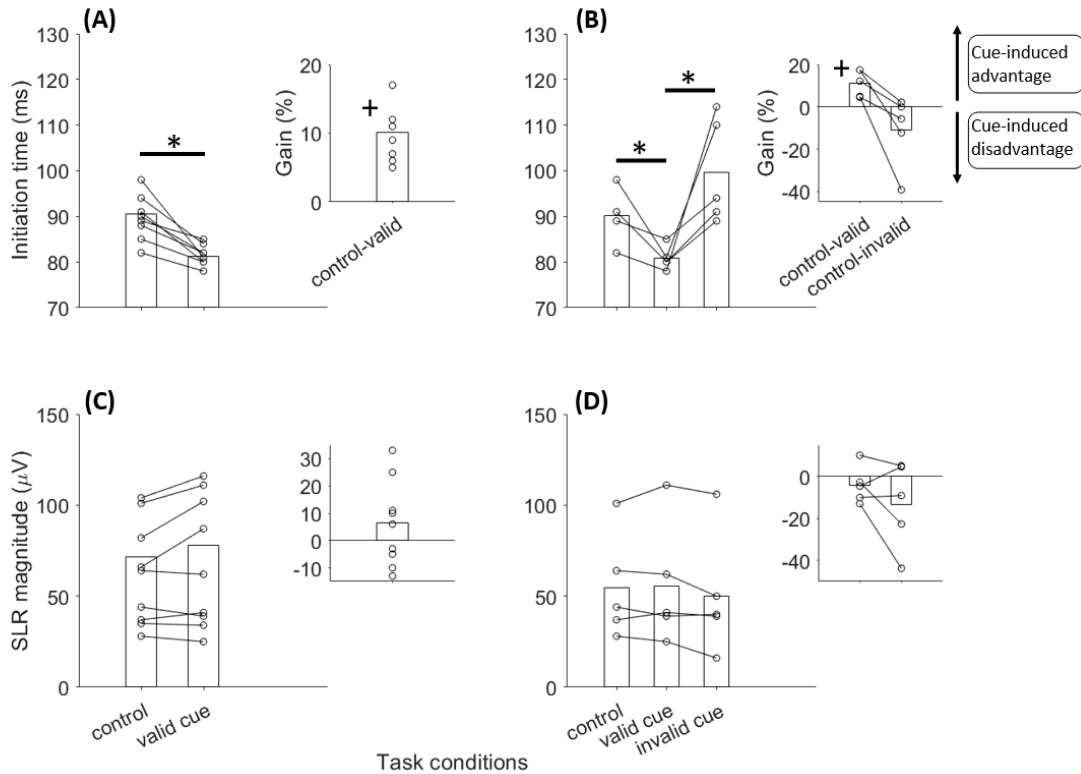

595

596 **Figure 9:** Latencies and magnitude of the express visuomotor responses in the second experiment. The first  
 597 column of panels shows the results of ten participants who exhibited an SLR in control and valid cue conditions  
 598 (see Table 2). The second column of panels shows the results of five participants who exhibited an SLR in  
 599 control, valid and invalid cue conditions (see Table 2). Validly cueing the target location with the low-contrast  
 600 cue led to significantly faster SLRs than control condition (A, \*  $p < 0.01$ ; B, \*  $p < 0.05$ ), and to a significantly  
 601 positive cue-induced percentage gain relative to control condition (inset plot in A, +  $p < 0.01$ ; inset plot in B, +  
 602  $p < 0.05$ ). Further, valid low-contrast cues led to significantly (\*  $p < 0.05$ ) faster SLRs than invalid cue conditions  
 603 (B).  
 604

605 The exemplar participant's results (Figure 8) were also consistent across the five  
 606 participants who exhibited an SLR in the high-contrast, valid cue and invalid cue conditions  
 607 (i.e. participants 2, 5, 7, 11 and 12, Table 2). For these participants, we ran a one-way  
 608 ANOVA analysis with task-condition (3 levels: control, valid cue, invalid cue) as within-  
 609 participant factor. A significant task-condition main effect was found for the initiation time  
 610 ( $F_{2,4}=6.9$ ,  $p=0.018$ ), but not for the SLR magnitude ( $p=0.213$ ). Post-hoc analysis showed  
 611 significantly faster SLRs with the valid than invalid cue conditions (paired t-test:  $t=3.3$ ,  
 612  $p=0.015$ ; Figure 9B). The SLR latency was also ~10ms shorter in control than invalid cue  
 613 conditions (Figure 9B), but this difference was not statistically significant (paired t-test:  
 614  $t=1.5$ ,  $p=0.1$ ). Invalid low-contrast cues led to negative percentage gains of SLR timing (~ -  
 615 11%, inset plot in Figure 9B) and magnitude (~ -13%, inset plot in Figure 9D) relative to  
 616 control conditions. However, the one-sample t-test did not show significant contrasts  
 617 (initiation time,  $t=1.5$ ,  $p=0.11$ ; SLR magnitude,  $t=1.4$ ,  $p=0.11$ ), probably because of the small

618 sample size. These findings suggest that cueing the location of high-contrast targets with  
619 barely detectable cues can modulate the SLR expression as a function of the compatibility  
620 between the two stimuli positions.

621 In figure 10 are shown the data of one participant (S1) who produced an SLR in  
622 control, low-contrast target and valid cue conditions, but not in the invalid cue condition (i.e.  
623 participant 1, Table 2). A similar SLR distribution was observed in only one other participant  
624 (S2) of the second experiment (i.e. participant 3, Table 2). Given that only two participants  
625 exhibited an SLR for the low-contrast target condition, we ran a single participant statistical-  
626 analysis to test the significance of the contrasts between the target conditions (see materials  
627 and methods; Contemori et al. 2020). Participant S1 had a median initiation time of 97ms and  
628 a 95% confidence interval of [90-104] for control target, 112ms [102-122] for low-contrast  
629 target and 81ms [73-90] for valid cue conditions. The SLR magnitude was 42 $\mu$ V [38-46] for  
630 control target, 28 $\mu$ V [21-35] for low-contrast target and 41 $\mu$ V [36-46] for valid cue  
631 conditions. For participant S2, the initiation time was 94ms [88-100] for control target,  
632 112ms [104-120] for low-contrast target and 84ms [77-91] for valid cue conditions. The SLR  
633 magnitude was 78 $\mu$ V [54-102] for control target, 48 $\mu$ V [24-72] for low-contrast target and  
634 85 $\mu$ V [72-92] for valid cue conditions. For both participants, the initiation time was  
635 significantly shorter ( $p<0.05$ ) with the valid cue condition than both control and low-contrast  
636 target conditions, and significantly longer than control with the low-contrast target condition.  
637 The SLR magnitude was significantly larger ( $p<0.05$ ) with the valid cue than low-contrast  
638 target conditions. The size of the SLR was also larger in the control than low-contrast target  
639 conditions, but this difference was statistically significant ( $p<0.05$ ) only for S1 (i.e.  
640 participant 1, Table 2). By contrast, for both participants the SLR size was not significantly  
641 different ( $p>0.05$ ) between the control and valid cue conditions. These results indicate that  
642 some participants are capable of producing SLRs both to high-contrast and low-contrast  
643 stimuli. However, low-contrast targets have less saliency for the generation of rapid and large  
644 SLRs as compared with high-contrast targets. Further, the data confirm the advantaging  
645 effects of valid and low-contrast cues and, conversely, the negative effects of invalid low-  
646 contrast cues relative to control conditions.

647

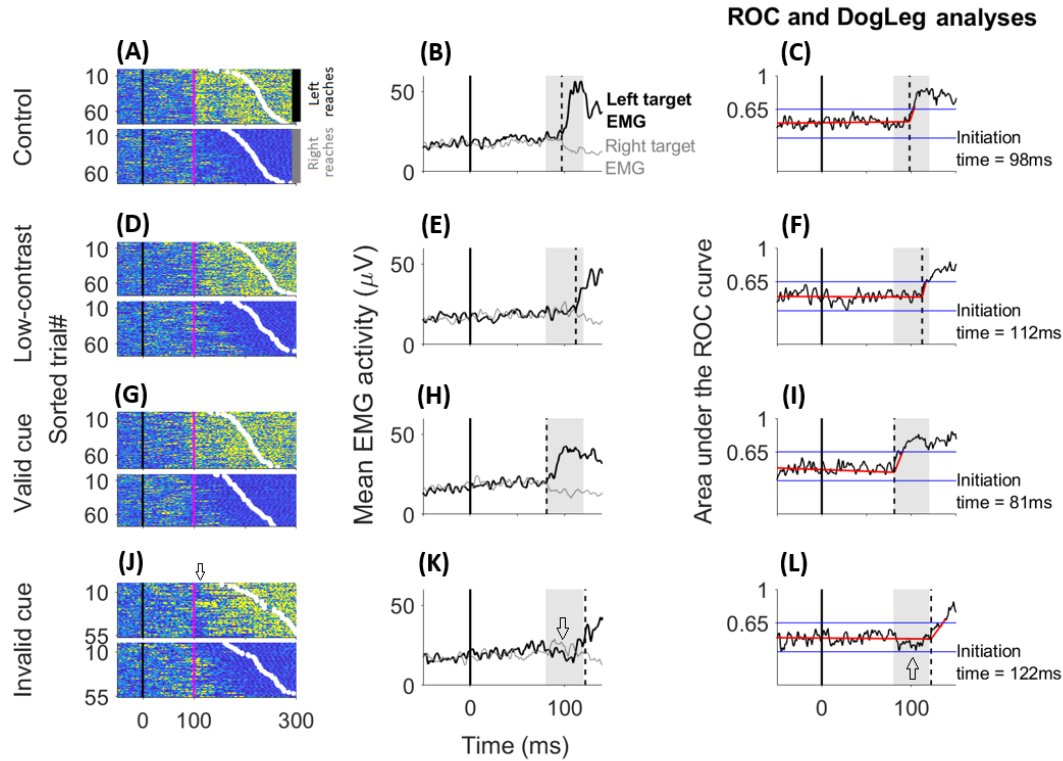

648

649 **Figure 10:** Surface EMG activity of the pectoralis major clavicular head muscle of a participant who exhibited  
650 an SLR in (A) control, (D) low-contrast target and (G) valid conditions, but not in (J) invalid cue condition  
651 (participant 1, Table 2). For each condition, rasters of rectified sEMG activity from individual trials (panel A, D,  
652 G and J), mean EMG traces (panel B, E, H and K) are shown, as are the outcomes of the time-series ROC and  
653 DogLeg linear regression analyses (panel C, F, I and L; same format as figure 8). For this participant, the ROC  
654 curve starts to deviate at 98ms in (C) control, 112ms in (F) low-contrast target and 81ms in (I) valid cue  
655 conditions, whereas the initiation time in (L) invalid target condition is at 122ms and, thereby after the SLR  
656 epoch (grey patch). In panel J, the arrow indicates short latency responses at ~100ms that are consistent with the  
657 low co-contrast cue location, before the muscle started responding to the high-contrast target. These rapid  
658 responses reflect the short-latency (~100ms) EMG activation for right targets and inhibition for left targets of  
659 the average EMG signal (arrow inside the grey patch in panel K), and underlies the negative deflection below  
660 0.5 chance level of the ROC curve within the SLR epoch (arrow inside the grey patch in panel L).

661

662

663

664 In figure 10J, short-latency responses can be observed at ~100ms in the invalid cue  
665 trials before the muscle started responding to the high-contrast target (arrow in figure 10J).  
666 This reflects the erroneous activation/inhibition of the PMch and underlies the negative  
667 deflection below 0.5 chance level of the ROC curve within the SLR epoch (arrow inside the  
668 grey patch in figure 10K and L). Some express motor signals encoding the low-contrast cue  
669 location appear to have been delivered to the muscles. Such express visuomotor responses to  
670 a barely detectable stimulus might then be rapidly overridden by a response to a more salient  
671 target, at least when both visual events occur within a short temporal interval. This hypothesis  
672 remains tentative, however, because this phenomenon was observed in only one participant.

672



673 **Correlation analyses**

674 *Correlating reaction time with SLR magnitude*

675 To disentangle the SLR contribution to volitional reaching behaviour, we tested the  
 676 correlation between SLR magnitudes and RTs. Figure 11A shows this correlation for an  
 677 exemplar participant (i.e. participant 2, Table 2). A negative RT x SLR magnitude correlation  
 678 was found consistently among the SLR observations in the first (one sample t-test; control,  $t$   
 679  $= 10.5, p < 0.001$ ; valid cue,  $t = 7.3, p < 0.001$ ; invalid cue,  $t = 6.9, p < 0.001$ ; Figure 11B) and  
 680 second experiments (one sample t-test; control,  $t = 8.5, p < 0.001$ ; valid cue,  $t = 7.2, p < 0.001$ ;  
 681 invalid cue,  $t = 7.7, p < 0.001$ ; Figure 11C). A significant negative correlation was also  
 682 observed for the two participants (S1, participant 1, Table 2; S2, participant 3, Table 2) who  
 683 exhibited an SLR to the low-contrast targets (Pearson correlation coefficient ( $r$ ): S1,  $r = -0.27,$   
 684  $p = 0.009$ ; S3,  $r = -0.49, p < 0.001$ ). These findings are consistent with previous work  
 685 (Pruszynski et al. 2010; Gu et al. 2016; Contemori et al. 2020), suggesting that the SLR  
 686 contributes functionally to the volitional initiation of target-directed reaches regardless of  
 687 how each is modulated by cues.

688

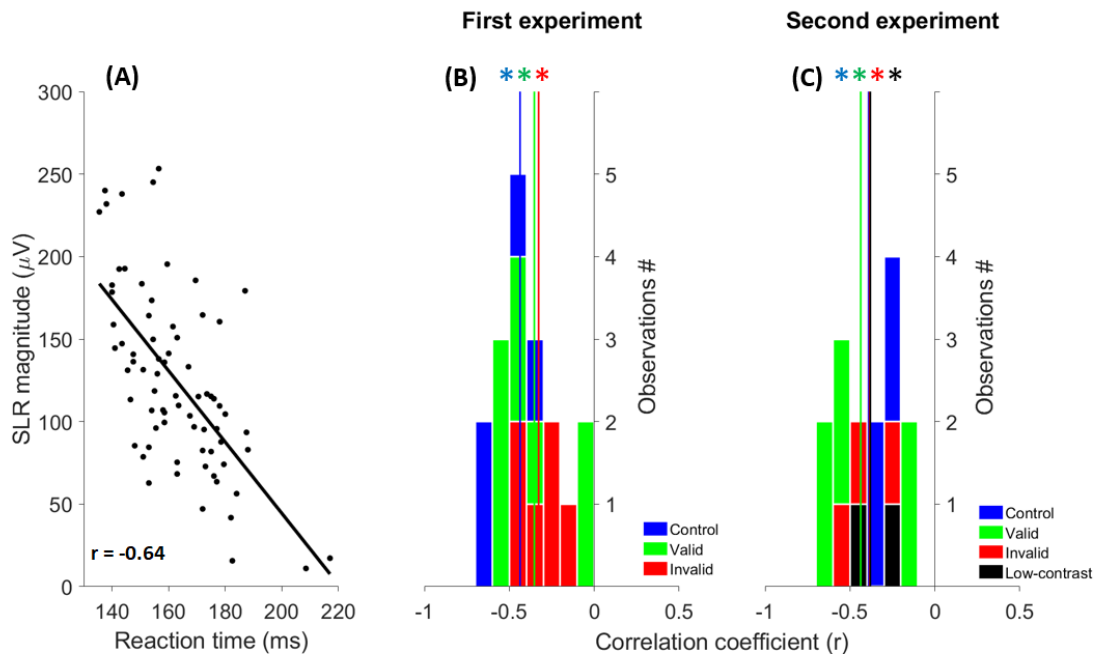

689

690 **Figure 11:** (A) Correlation between the reaction time and SLR magnitude from the pectoralis major clavicular  
 691 head for an exemplar participant who expressed an SLR in the second experiment valid cue condition  
 692 (participant 2, Table 2). Each data point represents a single trial and the solid blackline is the linear regression  
 693 function. (B) Group correlation coefficient for all participants with at least an SLR in control (12 participants),  
 694 valid (14 participants) or invalid (6 participants) cue conditions of the first experiment (see Table 1). (C) Group  
 695 correlation coefficient for all participants with at least an SLR in control (10 participants), valid cue (10  
 696 participants), invalid cue (5 participants) or low-contrast target (2 participants) conditions of the second  
 697 experiment (see Table 2). The vertical lines indicate the mean correlation coefficients. The SLR magnitude

698 demonstrates a significant negative correlation (\*  $p < 0.01$ ) with the movement initiation, irrespective of cueing  
699 the target location with symbolic (first experiment, B) or low-contrast cues (second experiment, C).  
700

## 701 DISCUSSION

### 702 *Experiment 1: Symbolic cue*

703 In this study, the reaching task required rapid identification of the target location  
704 relative to hand position in order to program the reaching direction and associated  
705 coordination between the agonist\antagonist muscles. The arrow-shaped cue provided  
706 symbolic, but not spatial, information regarding the future target location because its position  
707 was irrelevant with respect to the two possible target locations. That is, the target position  
708 could be predicted only via a cognitive extrapolation of the arrow orientation. When this  
709 information was valid, the RT was shorter than in control conditions. However, this cue-  
710 induced benefit turned into a behavioural cost (i.e. delaying RT) when the cue was invalid.  
711 These observations are consistent with an overt *attention orientation* mechanisms (Posner  
712 2016) that reflects cortical perception about the expected task.

713 In mammalian species, the neural networks involved in cortical attention orientation  
714 comprise complex feedback loops between prefrontal, parietal and sensory cortices and  
715 thalamic, basal ganglia and brainstem structures (for review see Baluch and Itti 2011;  
716 Knudsen 2018). For instance, Moore and Armstrong (2003) showed that microstimulation of  
717 the frontal eye field (FEF) enhanced neural activity of V4 area in monkeys. Further, the  
718 enhanced activity in V4 area was restricted to visual neurons encoding the visual field  
719 corresponding to the saccade that could be triggered by the FEF neurons undergoing the  
720 stimulation procedure. This suggests a cortico-cortical modulation mechanism by which  
721 higher-level premotor and motor areas can modify the activity of sensory cortices, such as  
722 those deputed to the processing of visual information. The symbolic cue-induced RT  
723 advantages may underlie priming mechanisms of the visual neurons encoding the cued  
724 location, consistent with an endogenous prioritization to sensory events occurring at the  
725 expected location. By contrast, the neural populations encoding the non-cued locations could  
726 be disengaged by suppressing cortico-cortical feedback signals (Baluch and Itti 2011;  
727 Knudsen 2018). This may result in a longer time to override the cue-driven expectation and  
728 transform the unexpected stimulus in the corresponding target-directed reach, consistent with  
729 the increase of volitional RTs with the invalid symbolic cues.

730 The prior information extrapolated from the symbolic cue also influenced the temporal  
731 and magnitude components of the SLR. Specifically, validly cueing the target location  
732 reduced the SLR initiation time and enlarged the SLR amplitude as compared to control

733 conditions, whereas the opposite was observed with invalid symbolic cues. The SLR is the  
734 biomarker of a neural network that can rapidly generate muscle responses, which are  
735 computed in a hand-centric reference frame (Gu et al. 2018). This neural network may  
736 include the midbrain superior colliculus and its downstream connections with the brainstem  
737 reticular formation, which then projects to interneurons and motoneurons in the spinal cord. It  
738 is noteworthy that the existence of a subcortical network operating rapid visuomotor  
739 transformations in humans would indicate that the sensorimotor transformation of visual  
740 events is not an exclusive duty of high-level cortical sensorimotor areas. Given that the  
741 symbolic cue required cognitive extrapolation, we propose that the cue-induced SLR  
742 modifications reflect a cortical top-down modulation of the putative subcortical SLR  
743 network, including the superior colliculus.

744 The superior colliculus contribution to SLR generation is supported by evidence of  
745 collicular involvement in the production of express saccades (Dorris et al. 1997). This  
746 midbrain structure receives direct retinal inputs, but is also mutually interconnected with  
747 cortical areas responsible for the cascade of neural operations that transforms visual events  
748 into motor actions (i.e. visual, parietal and frontal cortices; Boehnke and Munoz, 2008). Peel  
749 et al. (2017) reported activity decrements of the superior colliculus neurons when the frontal-  
750 eye-field in monkeys was cryogenically inactivated. More recently, Dash et al. (2018)  
751 showed that FEF inactivation correlated with reduced occurrence of express saccades relative  
752 to control conditions. Critically, these findings indicate that the cortical top-down signals to  
753 the superior colliculus can modulate the express visuomotor transformations operated by this  
754 midbrain structure.

755 Cortical signals encoding cognitive expectations can be conveyed to the neural  
756 structures responsible for low-level processing and the rapid sensorimotor transformation of  
757 visual inputs, such as the superior colliculus. Selectively manipulating the activity of the  
758 topographically organized collicular visual map according to expected locations may increase  
759 the response to congruent sensory events and diminish the response to unexpected stimuli.  
760 For example, preceding work has shown that the presentation of temporally and spatially  
761 predictable targets facilitated the initiation of target-directed saccades within the express  
762 range (~100ms; Paré and Munoz 1996; Dorris et al. 2007). This suggests a contribution of  
763 cognitive expectation to the generation of express visuomotor responses. Moreover,  
764 expecting a stimulus to occur at a defined position correlates with inhibition of activity of the  
765 superior colliculus neurons encoding the locations distant from the saccadic goal (Dorris and  
766 Munoz 1998). This suggests that rapid collicular visuomotor transformations are modulated  
767 as a function of the pre-target collicular activity, which can be biased by cortical top-down

768 signals originating from expectations about future sensory events. This cortical top-down  
769 priming might underlie a top-down attention orienting mechanism to increase the saliency of  
770 expected stimuli on the collicular visual map and to inhibit the responses to unexpected  
771 targets (Baluch and Itti 2011). Noteworthy, the cortical top-down SLR modulation hypothesis  
772 is consistent with recent evidence of SLR facilitation induced by temporal stimulus  
773 predictability and by briefly flashed stimuli, which activate both ON and OFF responses in  
774 superior colliculus (Contemori et al. 2020). This neural mechanism may underlie the faster  
775 and larger SLRs observed when the target appeared in an expected location, and the slower  
776 and smaller SLRs expressed with invalid cues relative to control conditions.

777

#### 778 *Experiment 2: Low-contrast cue*

779 The low-contrast targets had a low saliency for both volitional and express  
780 visuomotor behaviours, which underlies both the delayed RT and impaired SLR expression  
781 relative to control conditions. Only two participants exhibited an SLR for the low-contrast  
782 target condition (participants 1 and 3, Table 2) and it was delayed and smaller than that  
783 expressed with the high-contrast target condition. These results are consistent with previous  
784 work showing that both visual responses in the superior colliculus (Marino et al. 2010) and  
785 the SLR (Wood et al. 2015) are delayed as the target-to-background contrast is reduced.

786 Despite its low saliency, the low-contrast stimulus led both to volitional and express  
787 behaviour modulations when it was used as a cue for the high-contrast target. Specifically,  
788 the valid low-contrast cues reduced both the RT and SLR latency relative to control  
789 conditions, whereas the invalid cues led to the opposite effects. Further, invalid low-contrast  
790 cues obliterated the SLR in five out of ten participants who exhibited it in control and valid  
791 cue conditions (Table 2). These phenomena are unlikely to originate from the same neural  
792 mechanisms proposed for the symbolic cue effects. The symbolic cue was predictive for  
793 target location (i.e. 75% validity) and required cortical extrapolation of the arrow orientation,  
794 which we enabled experimentally by a CTOA >1s. By contrast, the low-contrast cues were  
795 designed to minimize cortical involvement by their low saliency, brief CTOA (~24ms) and  
796 irrelevant validity (50%). This is consistent with the low (~10%) occurrence of incorrect (i.e.  
797 cue-directed) reaches in the invalid cue conditions, which indicates that participants moved  
798 toward the high-contrast target even when it was invalidly cued by the low-contrast cue  
799 appearing in the opposite visual hemi field. Therefore, the SLR consequences of barely  
800 detectable cues likely originated from neural circuits operating low-level visual processing  
801 and visuomotor transformations, rather than cortical visuomotor networks.

802           The superior colliculus is known to perform low-level processing and short-latency  
803 visuomotor transformation of visual events detected by the retinal photoreceptors (Boehnke  
804 and Munoz 2008; Gandhi and Katnani 2011; Basso and May 2017). Furthermore, this  
805 midbrain structure is proposed to contribute to mechanisms of bottom-up attention orientation  
806 (Baluch and Itti 2011; Knudsen 2018). The bottom-up attention evolves rapidly after a  
807 sensory event and is exclusively sensitive to the physical attributes of the stimulus, such as its  
808 spatial location (Baluch and Itti 2011). Neural correlates of bottom-up attention orientation in  
809 the superior colliculus have been reported in non-human primates, and there is some evidence  
810 that perturbations of superior colliculus activity can influence both conscious perception and  
811 volitional motor behaviour (Baluch and Itti 2011; Corneil and Munoz 2014; Knudsen 2018).  
812 For instance, Muller et al. (2005) showed that microstimulation of the superior colliculus  
813 neurons improved perceptual task performance when visual stimuli appeared at locations  
814 encoded by the stimulated collicular neurons. Furthermore, Zénon and Krauzlis (2012)  
815 reported a perception deficit for stimuli presented at a location encoded by visual collicular  
816 neurons that were previously inactivated, but not for distracting stimuli presented outside the  
817 inactivated collicular receptive field. More recently, Bogadhi et al. (2020) have shown that  
818 superior colliculus inactivation modulates neural correlates of high-level visual functions  
819 (e.g. spatial and object-selective attention, stimulus detection) on the superior temporal sulcus  
820 in monkeys. Overall, these findings suggest that the superior colliculus can bias the cortical  
821 mechanisms of stimulus detection and selection. Further, Fecteau et al. (2004) showed an  
822 increase of target-related collicular response and a corresponding reduction of target-directed  
823 saccade onset time when the target was validly cued by another stimulus appearing at the  
824 same location ~50ms in advance. A 50ms CTOA is arguably sufficient time for bottom-up  
825 collicular modulation of target processing in primary visual cortex, but this mechanism seems  
826 less plausible for the ~24ms CTOA and low-contrast cues of our second experiment.

827           We propose that the cue-induced SLR modifications reported here reflect a  
828 spatiotemporal integration of the low-contrast and high-contrast stimuli accomplished  
829 subcortically through the tecto-reticulo-spinal circuits, rather than via cortical top-down  
830 feedback mechanisms. More specifically, we propose that the express visuomotor response in  
831 the valid cue conditions was faster than control because it was superimposed upon residual  
832 activity in the superior colliculus originating from the low-contrast cue. Functionally, this  
833 might aid the onset of rapid visuomotor responses to visual stimuli spatially congruent with  
834 weak sensory events that were recently experienced.

835

836 *Methodological considerations and future directions*

837 Cueing the target location modified both volitional and express visuomotor responses,  
838 which may reflect priming mechanisms of top-down origin for the symbolic cues and bottom-  
839 up origin for low-contrast cues. However, it is unclear which cue type had the highest  
840 saliency to modulate the SLR expression, at least for the cue paradigms adopted here. Future  
841 studies should use different versions of our cueing paradigms to further delineate the neural  
842 mechanisms behind this express visuomotor behaviour in humans.

843 In this study, we reasoned that the effects of the symbolic cue reflected a cortical top-  
844 down priming of visuomotor networks, including the putative subcortical SLR-network.  
845 However, alternative interpretations might explain our observations. In the control  
846 conditions, the target appeared randomly to the left or right of participants' dominant hand.  
847 Therefore, two distinct and competing motor programs could be prepared and coexist in the  
848 subcortical circuitry until that compatible with the actual target location was chosen and  
849 released. The integration between visual and motor-preparation signals could be facilitated if  
850 the competition between prepared motor programs is resolved, at least partially, before the  
851 stimulus presentation by cueing the target location. This would be expected to potentiate the  
852 SLR expression when the stimulus appears at a location congruent with the cue-related motor  
853 program and impair it when the prepared motor program mismatches the target location. For  
854 example, visual inputs to the superior colliculus might quickly trigger the nodes that are  
855 involved in the release of prepared responses (e.g. brainstem reticular formation nuclei; see  
856 for review Marinovic and Tresilian 2016; Carlsen and Maslovat 2019). Noteworthy, these  
857 hypotheses are consistent with the positive and negative cue-induced SLR gains observed in  
858 the first experiment. However, motor preparation mechanisms cannot underlie the effects of  
859 low-contrast cues because they were barely detectable, had weak predictive value (50%) and  
860 appeared too shortly (~24ms) before the high-contrast target to allow the pre-target  
861 preparation of a specific motor response. Nonetheless, we acknowledge that neural  
862 mechanisms consistent with motor preparation might contribute to SLR generation and,  
863 therefore, should receive attention for future investigations on this express visuomotor  
864 behaviour.

865

866 *Conclusions*

867 This study has shown that cueing the location of a visual target modulates express  
868 visuomotor responses in humans. Symbolic cues appear able to modify express visuomotor  
869 behaviour via cortical top-down feedback signals to the putative subcortical SLR-network,

870 including the superior colliculus and its downstream reticulo-spinal circuits. These  
871 phenomena illustrate a mechanism by which cognitive expectations can modulate the critical  
872 nodes for SLR generation to speed-up the visuomotor responses to expected visual events. By  
873 contrast, the effects of low-contrast cues appear to reflect exogenous priming mechanisms,  
874 potentially evolving subcortically via the superior colliculus. These mechanisms might aid  
875 the spatiotemporal integration of spatially congruent visual signals along the tecto-reticulo-  
876 spinal pathway and facilitate rapid response initiation when a salient stimulus follows a weak  
877 visual event. Overall, our findings help to constrain models of the neural mechanisms  
878 responsible for express visuomotor responses in humans.

879

#### 880 *Acknowledgements*

881 This work was supported by operating grants from the Australian Research Council  
882 (DP170101500) awarded to T.J. Carroll, B.D. Corneil, G.E. Loeb and G. Wallis.

883

884 REFERENCES

- 885 • Atsma J, Maij F, Gu C, Medendorp WP, Corneil BD. Active braking of whole-arm  
886 reaching movements provides single-trial neuromuscular measures of movement  
887 cancellation. *J Neurosci.* 38:4367-4382, 2018.
- 888 • Baluch F and Itti L. Mechanisms of top-down attention. *Trends Neurosci.* 34:210-224,  
889 2011.
- 890 • Basseville M and Nikiforov IV. Detection of abrupt changes: theory and application  
891 (Information and System Sciences Series). Prentice Hall. 1993.
- 892 • Basso MA, May PJ. Circuits for action and cognition: A view from the superior colliculus.  
893 *Annu Rev Vis Sci.* 3:197-226, 2017.
- 894 • Boehnke SE and Munoz DP. On the importance of the transient visual response in the  
895 superior colliculus. *Curr Opin Neurobiol.* 18:544-551, 2008.
- 896 • Bogadhi AR, Katz LN, Bollimunta A, Leopold DA, Krauzlis RJ. Midbrain activity shapes  
897 high-level visual properties in the primate temporal cortex. *Neuron.* 2020 Dec 8:S0896-  
898 6273(20)30928-4. doi: 10.1016/j.neuron.2020.11.023. Epub ahead of print. PMID:  
899 33338395.
- 900 • Brainard DH. The Psychophysics Toolbox. *Spat Vis.* 10:433-436, 1997.
- 901 • Carlsen AN, Maslovat D. Startle and the StartReact effect: physiological mechanisms. *J*  
902 *Clin Neurophysiol.* 36:452– 459, 2019.
- 903 • Carroll TJ, McNamee D, Ingram JN, Wolpert DM. Rapid visuomotor responses reflect  
904 value-based decisions. *J Neurosci.* 39:3906 –3920, 2019.
- 905 • Contemori S, Loeb GE, Corneil BD, Wallis G, Carroll TJ. The influence of temporal  
906 predictability on express visuomotor responses. *J Neurophysiol.* 2020 Dec 23.  
907 10.1152/jn.00521.2020. Epub ahead of print. PMID: 33357166.
- 908 • Corneil BD and Munoz DP. Overt responses during covert orienting. *Neuron.* 82, 1230–  
909 1243, 2014.
- 910 • Corneil BD, Munoz DP, Chapman BB, Admans T, Cushing SL. Neuromuscular  
911 consequences of reflexive covert orienting. *Nat Neurosci.* 11:13-15, 2008.
- 912 • Dash S, Peel TR, Lomber SG, Corneil BD. Frontal eye field inactivation reduces saccade  
913 preparation in the superior colliculus but does not alter how preparatory activity relates to  
914 saccades of a given latency. *eNeuro.* 5: ENEURO.0024-18.2018, 2018.
- 915 • Dorris MC, Klein RM, Everling S, Munoz DP. Contribution of the primate superior  
916 colliculus to inhibition of return. *J Cogn Neurosci.* 14:1256-1263, 2002.



- 917 • Dorris MC and Munoz DP. Saccadic probability influences motor preparationsignals and  
918 time to saccadic initiation. *J Neurosci.* 18:7015–7026, 1998.
- 919 • Dorris MC, Olivier E, Munoz DP. Competitive integration of visual and preparatory  
920 signals in the superior colliculus during saccadic programming. *The Journal of*  
921 *Neuroscience.* 27(19), 5053–5062, 2007.
- 922 • Dorris MC, Pare M, Munoz DP. Neuronal activity in monkey superior colliculus related to  
923 the initiation of saccadic eye movements. *J Neurosci.* 17:8566-8579, 1997.
- 924 • Fecteau JH, Bell AH, Munoz DP. Neural correlates of the automatic and goal-driven  
925 biases in orienting spatial attention. *J Neurophysiol.* 92(3):1728-37, 2004.
- 926 • Fiehler K, Brenner E, Spering M. Prediction in goal-directed action. *J Vis.* 10:1-21, 2019.
- 927 • Fischer B. and Boch R. Saccadic eye-movements after extremely short reaction-times in  
928 the monkey. *Brain Res.* 260:21-26, 1983.
- 929 • Gandhi NJ and Katnani HA. Motor functions of the superior colliculus. *Annu Rev*  
930 *Neurosci.* 34:205-231, 2011.
- 931 • Gu C, Pruszynski JA, Gribble PL, Corneil BD. A rapid visuomotor response on the human  
932 upper limb is selectively influenced by implicit motor learning. *J Neurophysiol.* 121:85-  
933 95, 2019.
- 934 • Gu C, Pruszynski JA, Gribble PL, Corneil BD. Done in 100 ms: Path-dependent  
935 visuomotor transformation in the human upper limb. *J Neurophysiol.* 119:1319-1328,  
936 2018.
- 937 • Gu C, Wood DK, Gribble PL, Corneil BD. A trial-by-trial window into sensorimotor  
938 transformations in the human motor periphery. *J Neurosci.* 36:8273-82, 2016.
- 939 • Haith AM, Pakpoor J, Krakauer JW. Independence of movement preparation and  
940 movement initiation. *J Neurosci.* 36:3007-3015, 2016.
- 941 • Kingdom, F. A. A., and Prins, N. (2016). “Chapter 5: Adaptive methods,” in  
942 *Psychophysics* (San Diego, CA: Academic Press), 119–148.
- 943 • Klein, R.M. Inhibition of return. *Trends Cogn Sci.* 4, 138–147, 2000.
- 944 • Knudsen EI. Neural circuits that mediate selective attention: a comparative perspective.  
945 *Trends Neurosci.* 41:789-805, 2018.
- 946 • Kozak AR, Cecala AL, Corneil BD. An emerging target paradigm evokes fast visuomotor  
947 responses on human upper limb muscles. *J Vis Exp.* e61428, doi:10.3791/61428, 2020.
- 948 • Kozak RA, Kreyenmeier P, Gu C, Johnston K, Corneil BD. Stimulus-locked responses on  
949 human upper limb muscles and corrective reaches are preferentially evoked by low spatial  
950 frequencies. *eNeuro.* 6(5):ENEURO.0301-19. 2019.

- 951 • Marino RA, Levy R, Boehnke S, White BJ, Itti L, Munoz DP. Linking visual response  
952 properties in the superior colliculus to saccade behavior. *Eur J Neurosci.* 35:1738–1752,  
953 2012.
- 954 • Marinovic W, Tresilian JR. Triggering prepared actions by sudden sounds: reassessing the  
955 evidence for a single mechanism. *Acta Physiol.* 217:13–32, 2016.
- 956 • Moore T and Armstrong K. Selective gating of visual signals by microstimulation of  
957 frontal cortex. *Nature.* 421, 370–373, 2003.
- 958 • Muller J et al. Microstimulation of the superior colliculus focuses attention without  
959 moving the eyes. *Proc. Natl. Acad. Sci.U.S.A.* 102, 524–529, 2005.
- 960 • Pare M and Munoz DP. Saccadic reaction time in the monkey: advanced preparation of  
961 oculomotor programs is primarily responsible for express saccade occurrence. *J*  
962 *Neurophysiol.* 76:3666-3681, 1996.
- 963 • Peel TR, Dash S, Lomber SG, and Corneil BD. Frontal eye field inactivation diminishes  
964 superior colliculus activity, but delayed saccadic accumulation governs reaction time  
965 increases. *J Neurosci.* 37: 728 11715-11730, 2017.
- 966 • Pelli DG. The VideoToolbox software for visual psychophysics: Transforming numbers  
967 into movies. *Spat Vis.* 10:437-442, 1997.
- 968 • Posner MI. Orienting of attention: Then and now. *Q J Exp Psychol (Hove).* 69(10):1864-  
969 1875, 2016.
- 970 • Pruszynski AJ, King GL, Boisse L, Scott SH, Flanagan RJ, Munoz DP. Stimulus-locked  
971 responses on human arm muscles reveal a rapid neural pathway linking visual input to arm  
972 motor output. *Eur J Neurosci.* 32:1049-1057, 2010.
- 973 • Pruszynski JA, Kurtzer I, Scott SH. Rapid motor responses are appropriately tuned to the  
974 metrics of a visuospatial task. *J Neurophysiol.* 100:224–238, 2008.
- 975 • van Ede F, de Lange FP, Maris E. Attentional cues affect accuracy and reaction time via  
976 different cognitive and neural processes. *J Neurosci.* 2012; 32:10408-10412.
- 977 • Wood DK, Gu C, Corneil BD, Gribble PL, Goodale MA. Transient visual responses reset  
978 the phase of low-frequency oscillations in the skeletomotor periphery. *Eur J Neurosci.*  
979 42:1919-1932, 2015.
- 980 • Zenon A and Krauzlis RJ. Attention deficits without cortical neuronal deficits. *Nature.*  
981 489, 434–437, 2012.
